# Supplementary material for: Synthesis of benzo[a]carbazole derivatives via intramolecular cyclization using Brønsted acidic carbonaceous material as the catalyst
Source: Royal Society of Chemistry journal article supplement (doi:10.1039/d3ra04943d), 2023-01-01

## Supporting information

For

### Synthesis of benzo[*a*]carbazole derivatives *via* the intramolecular cyclization using Brønsted acidic carbonaceous material as the catalyst

Hai Truong Nguyen,<sup>a,b</sup> Phat Ngoc Nguyen,<sup>a,b</sup> Tan Van Le,<sup>a,b</sup> Trinh Hao Nguyen,<sup>a,b</sup> Linh Dieu  
Nguyen,<sup>a,b</sup> Phuong Hoang Tran<sup>a,b\*</sup>

- <sup>a</sup> Department of Organic Chemistry, Faculty of Chemistry, University of Science, Vietnam National University, Ho Chi Minh City 700000, Viet Nam.  
Email: thpuong@hcmus.edu.vn
- <sup>b</sup> Vietnam National University, Ho Chi Minh City 700000, Viet Nam.

### Table of contents

|                                                                                                          |               |
|----------------------------------------------------------------------------------------------------------|---------------|
| <b>Section S1. Amorphous carbon-immobilized sulfonic acid characterization<br/>(AC- SO<sub>3</sub>H)</b> | <b>S1-S4</b>  |
| <b>Section S2. NMR spectra, and HRMS(ESI)</b>                                                            | <b>S5-S24</b> |

## Section S1. Amorphous carbon-immobilized sulfonic acid characterization (AC- SO<sub>3</sub>H)

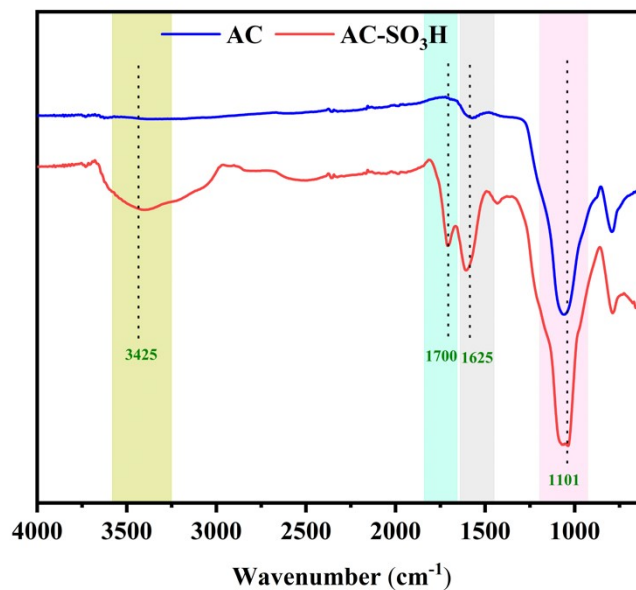

**Fig. S1.** FT-IR spectrum of AC and AC-SO<sub>3</sub>H.

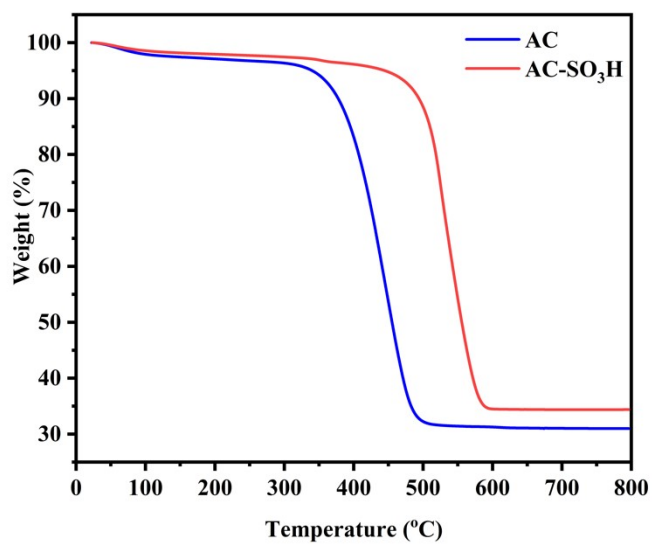

**Fig. S2.** TGA curves of AC and AC-SO<sub>3</sub>H.

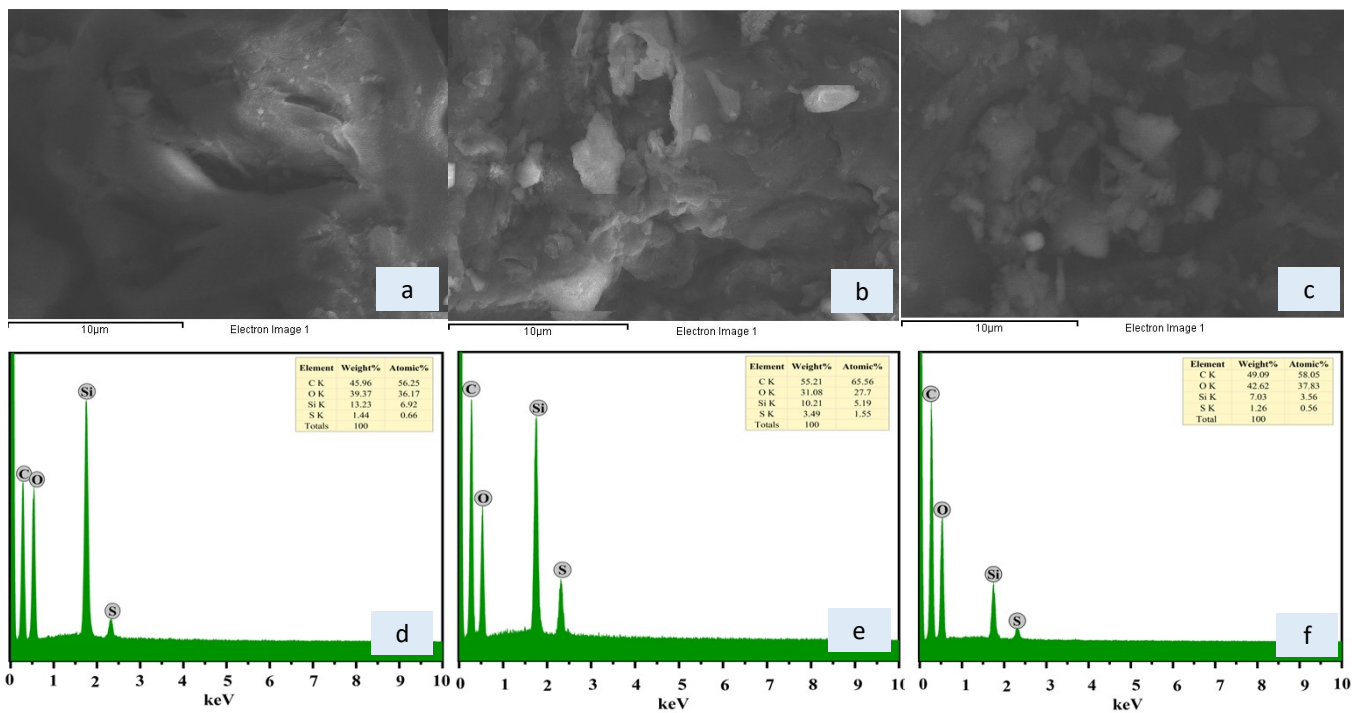

**Fig. S3.** SEM image of AC (a), AC-SO<sub>3</sub>H (b), AC-SO<sub>3</sub>H after three times (c); EDX analysis of AC (d), AC-SO<sub>3</sub>H (e), AC-SO<sub>3</sub>H after three times (f).

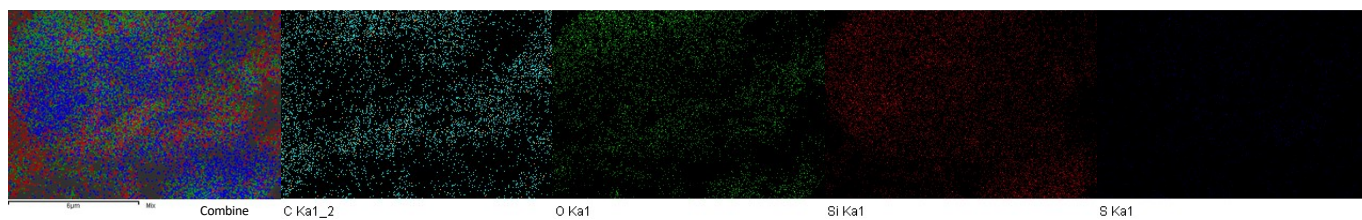

**Fig. S4.** Elemental mapping analysis of AC-SO<sub>3</sub>H.

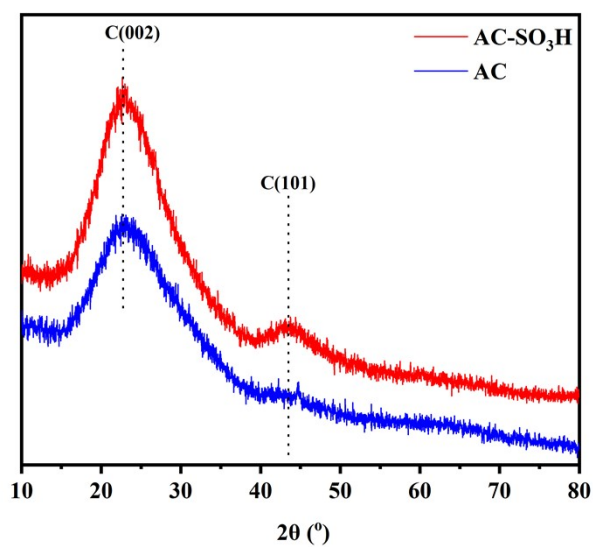

**Fig. S5.** P-XRD analysis of AC and AC-SO<sub>3</sub>H.

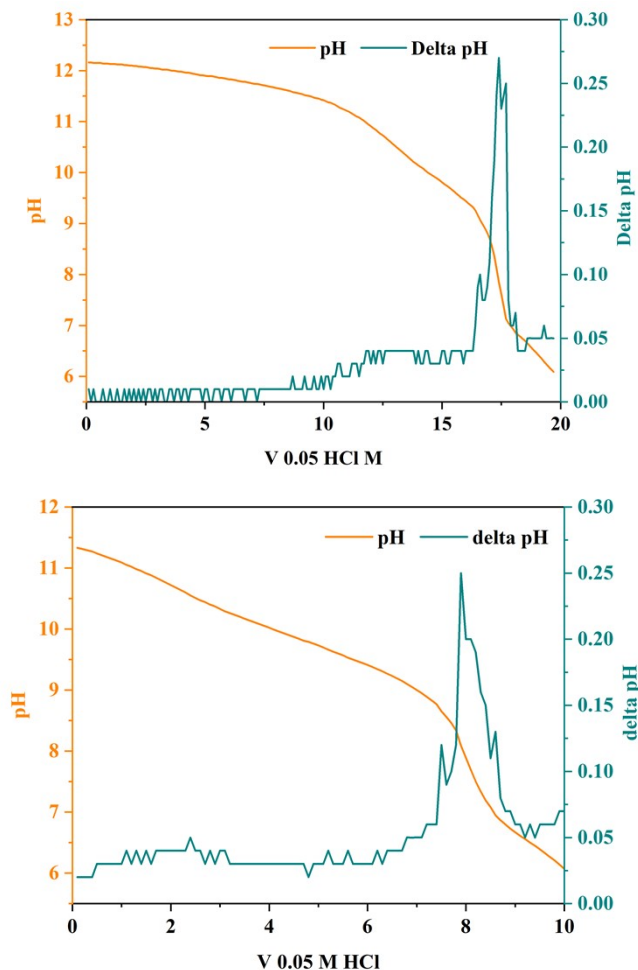

**Fig. 6.** Direct pH-metric titration curves with HCl solutions for AC (above) and AC-SO<sub>3</sub>H (below); 0.05 N NaOH calibrated with oxalic acid was 0.0497 N; 0.05 N HCl calibrated with borates was 0.0492 N.

**Table S1.** Acidity of the AC, and AC-SO<sub>3</sub>H by Boehm titration.

| Materials            | Acidity (mmol/g)               |                    |
|----------------------|--------------------------------|--------------------|
|                      | SO <sub>3</sub> H <sup>a</sup> | Total <sup>b</sup> |
| AC                   | -                              | 0.828              |
| AC-SO <sub>3</sub> H | 2.185                          | 4.606              |

<sup>a</sup>Calculated based on ICP-MS.

<sup>b</sup>SO<sub>3</sub>H, carboxylic acid, phenolic groups.

## Section S2. NMR spectra, and HRMS(ESI)

### $^1\text{H}$ , $^{13}\text{C}$ NMR spectra, FTIR, and HRMS(ESI) of 5-amino-9,9-dimethyl-7-oxo-11-phenyl-8,9,10,11-tetrahydro-7*H*-benzo[*a*]carbazole-6-carbonitrile (1a)

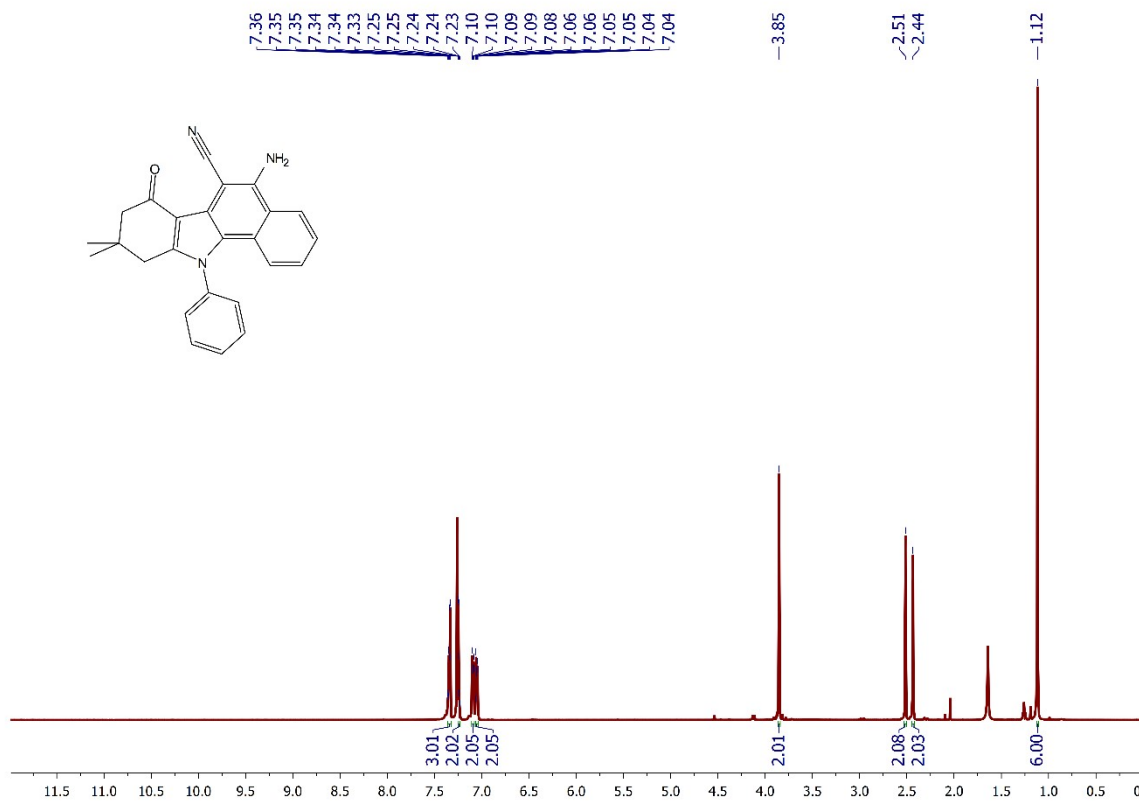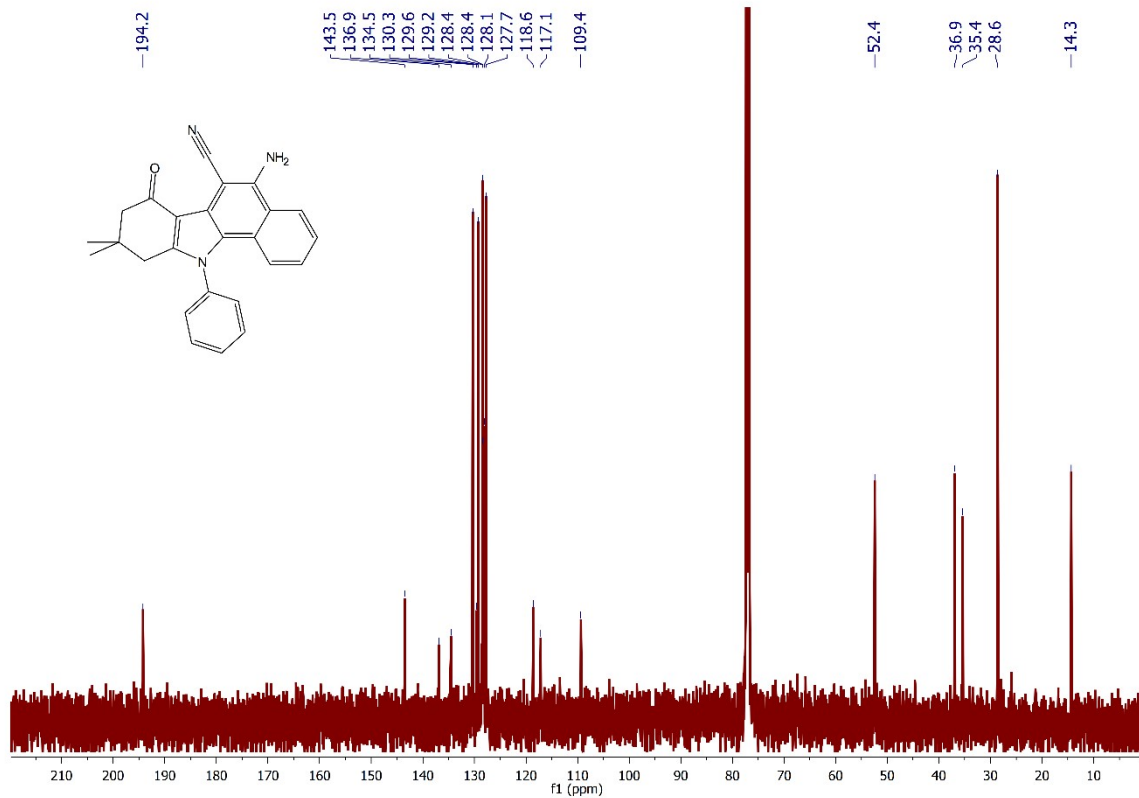

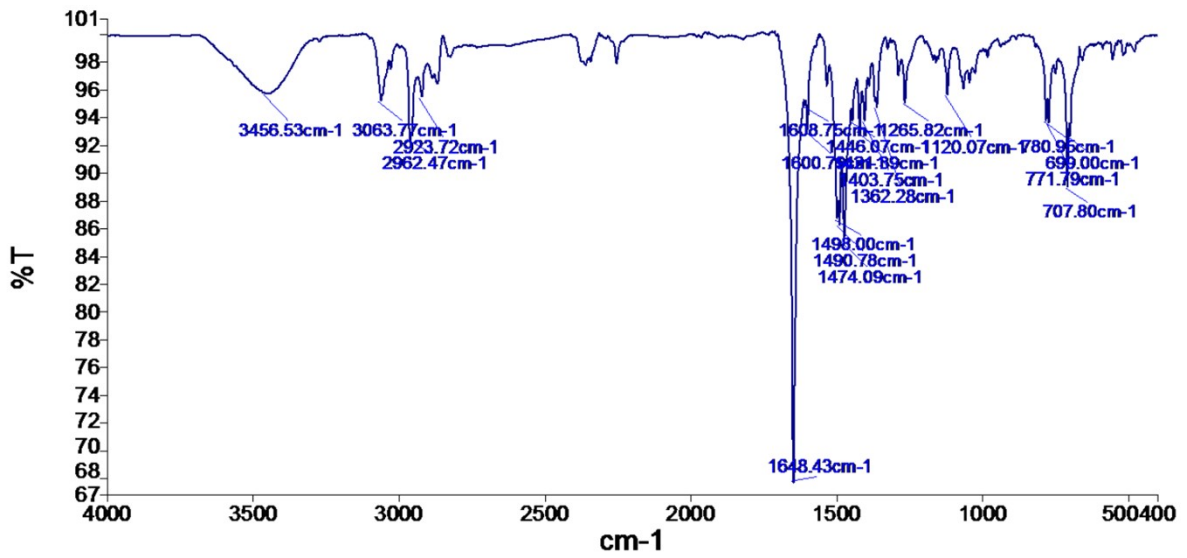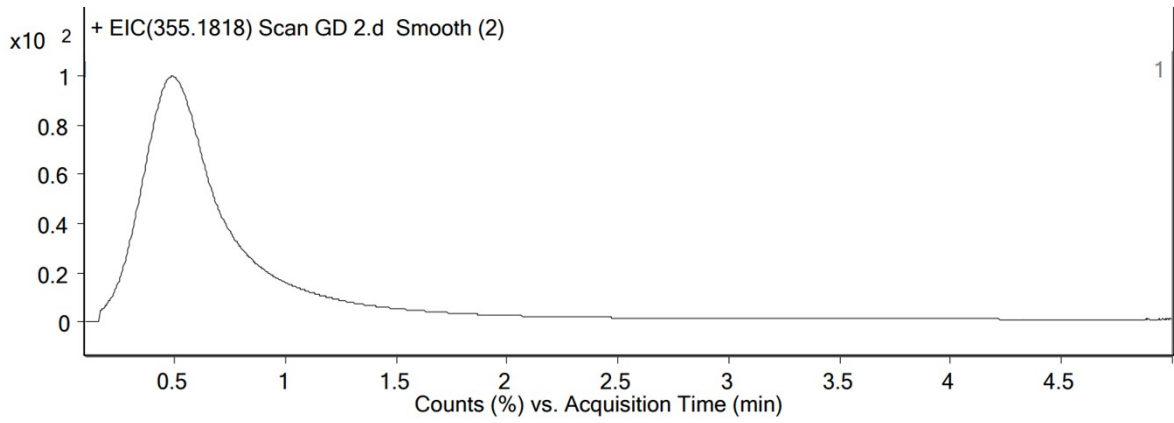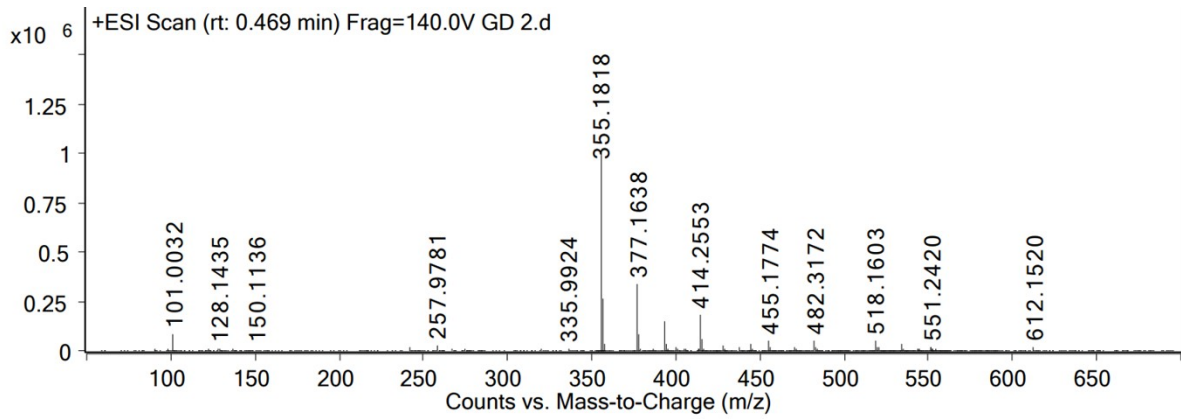

**<sup>1</sup>H, <sup>13</sup>C NMR spectra and HRMS of 5-Amino-9,9-dimethyl-7-oxo-11-(*p*-tolyl)-8,9,10,11-tetrahydro-7*H*-benzo[*a*]carbazole-6-carbonitrile (2a)**

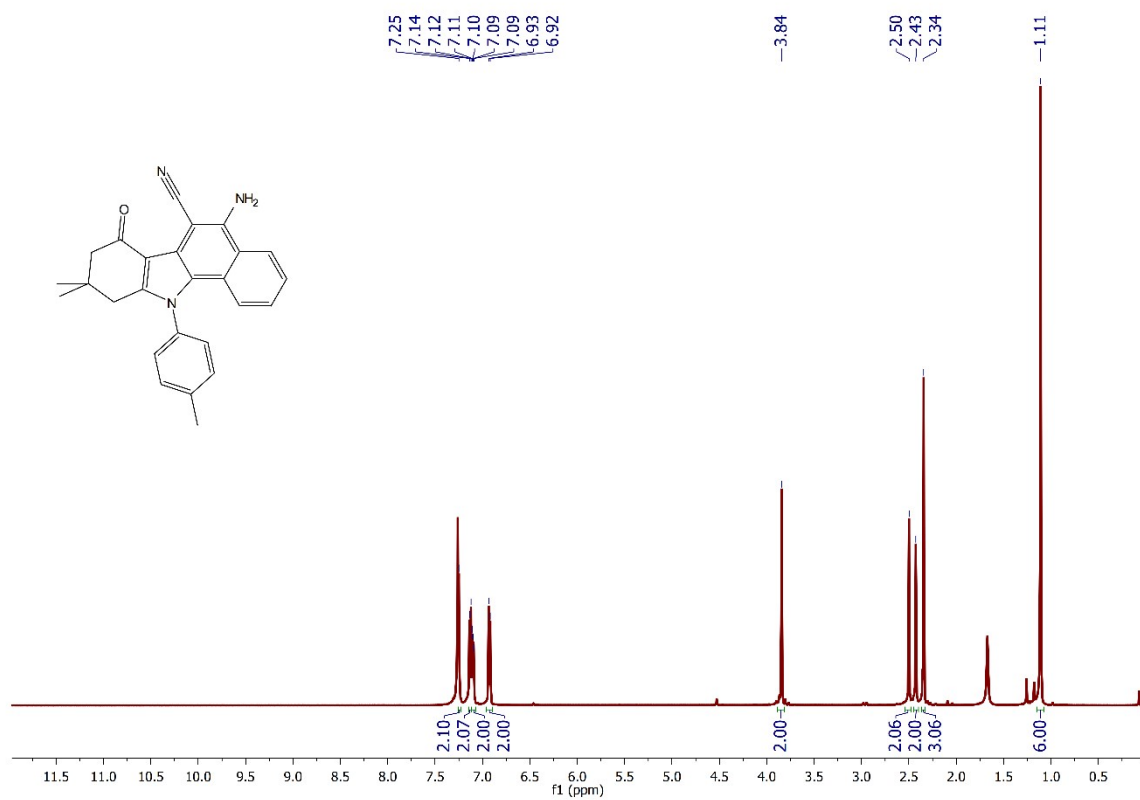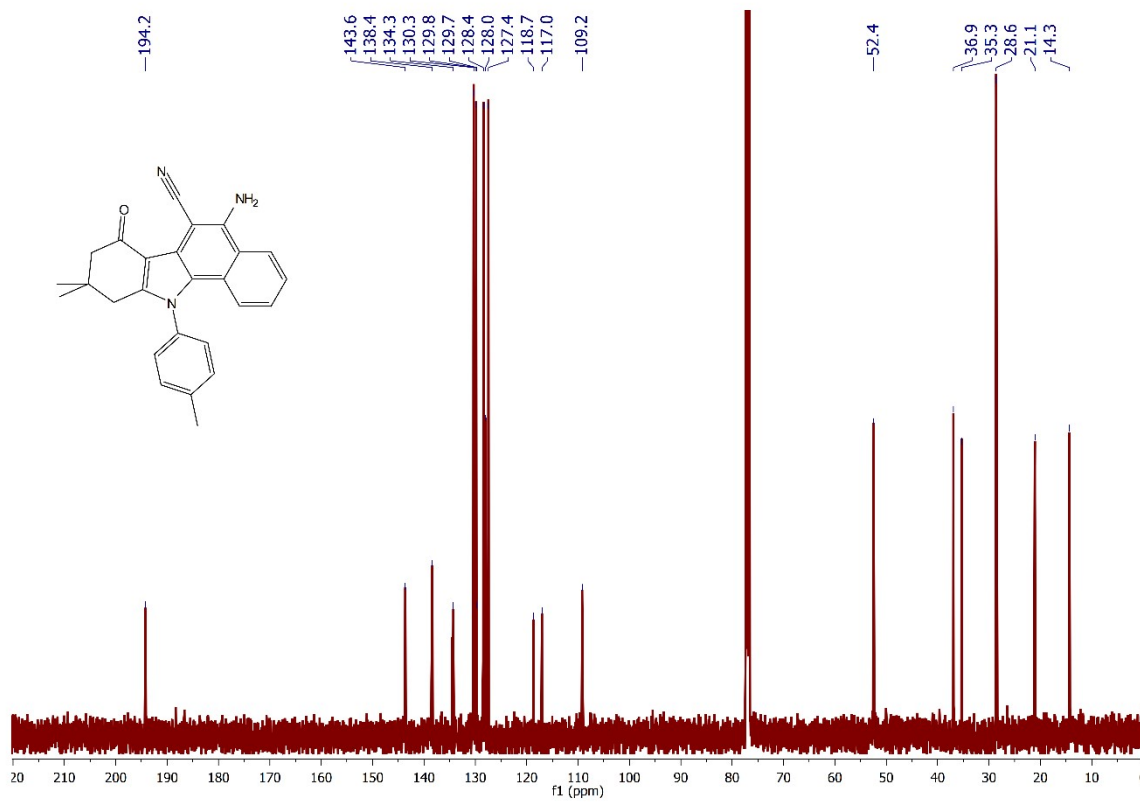

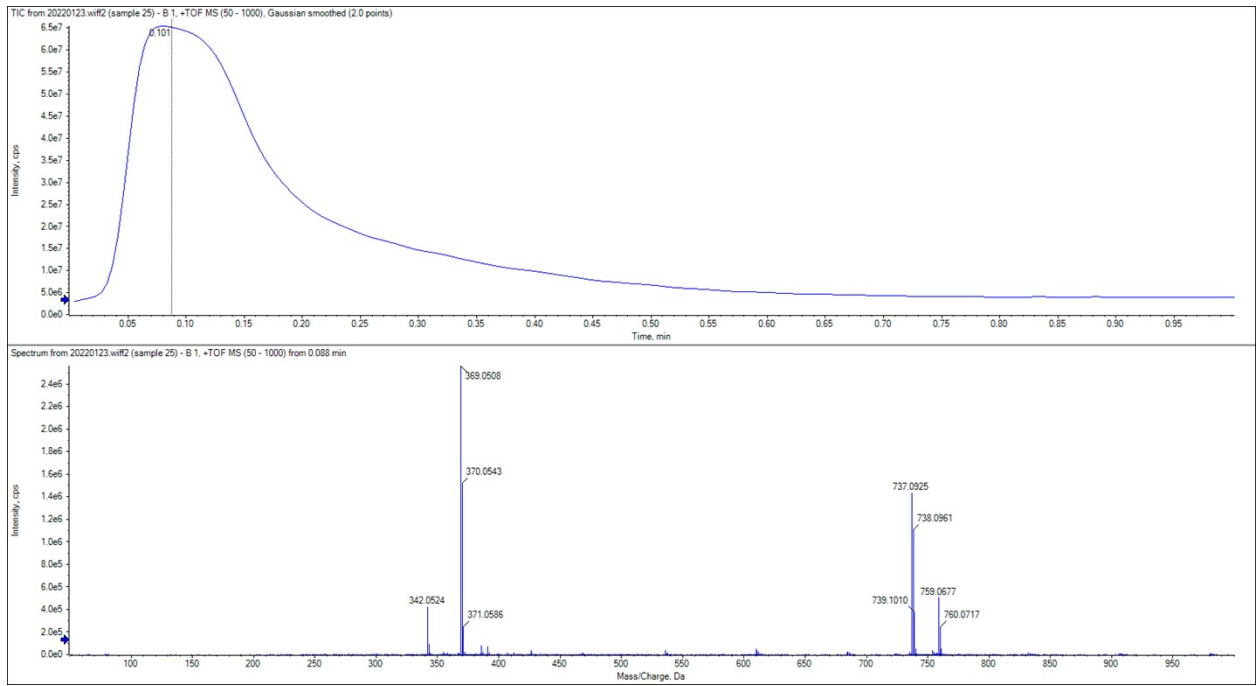



**$^1\text{H}$ ,  $^{13}\text{C}$  NMR spectra and HRMS of 5-amino-11-(4-methoxyphenyl)-9,9-dimethyl-7-oxo-8,9,10,11-tetrahydro-7H-benzo[*a*]carbazole-6-carbonitrile (3a)**

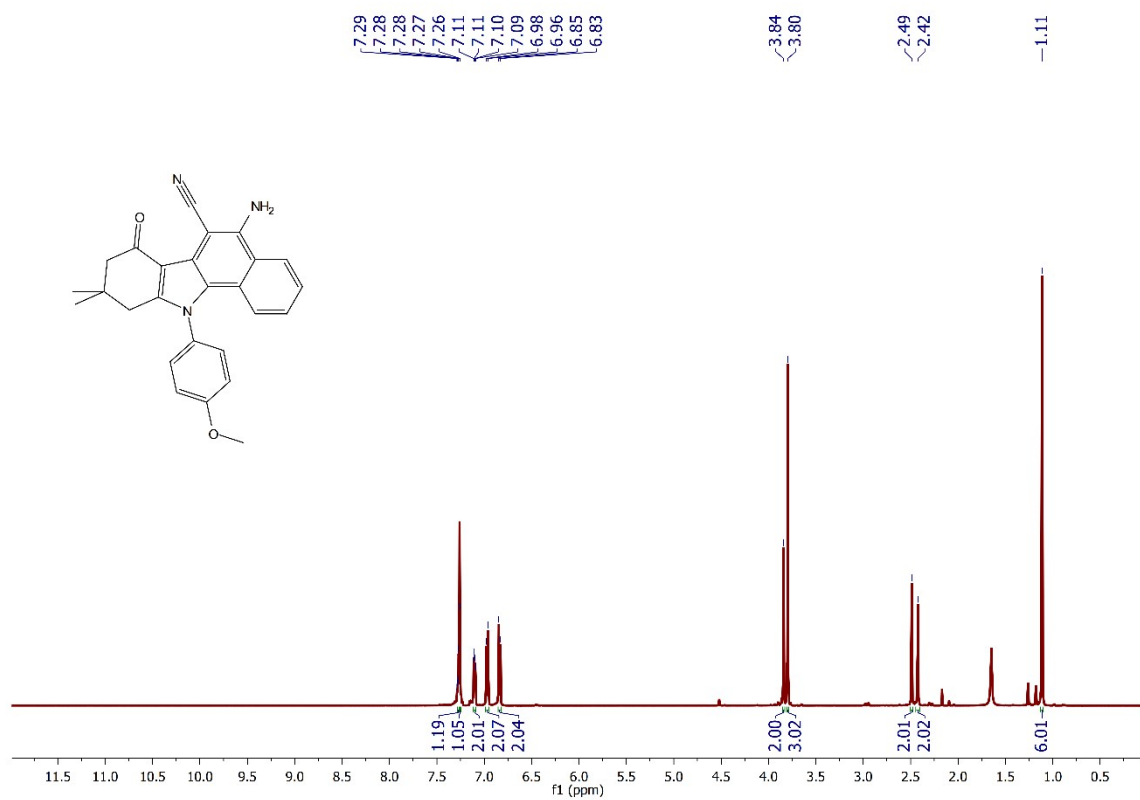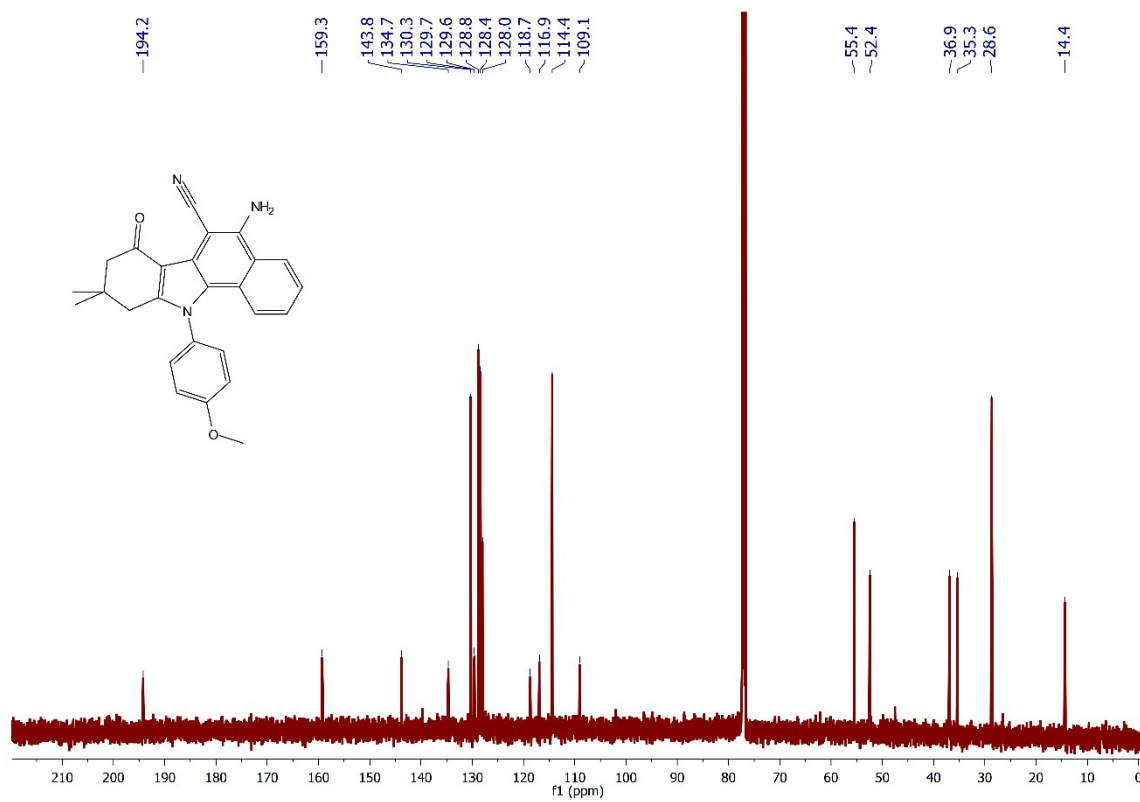

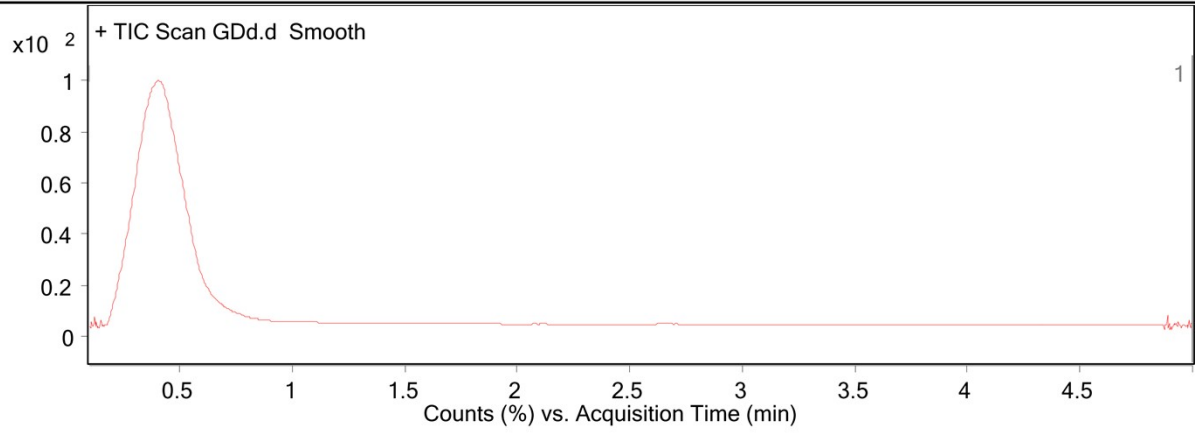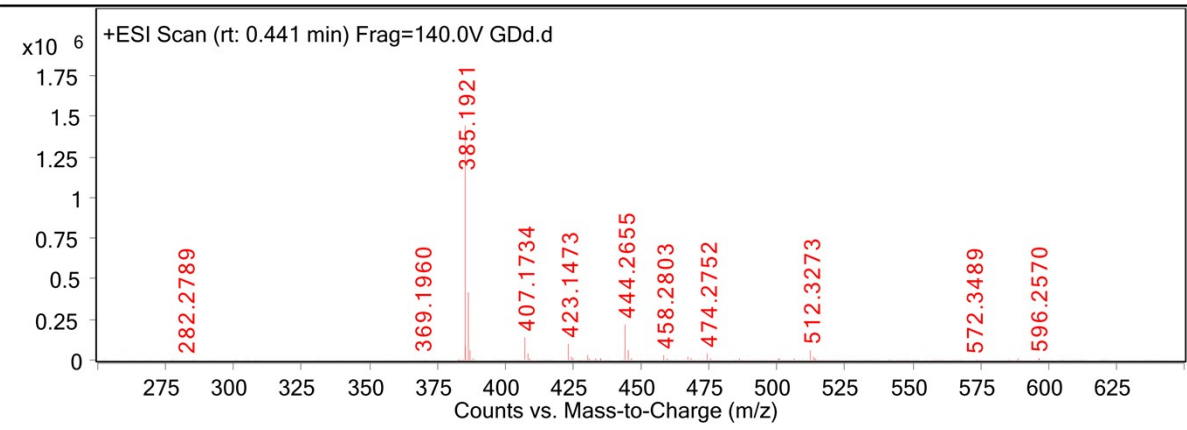

**$^1\text{H}$ ,  $^{13}\text{C}$  NMR spectra and HRMS of 5-amino-11-(4-bromophenyl)-9,9-dimethyl-7-oxo-8,9,10,11-tetrahydro-7H-benzo[*a*]carbazole-6-carbonitrile (4a)**

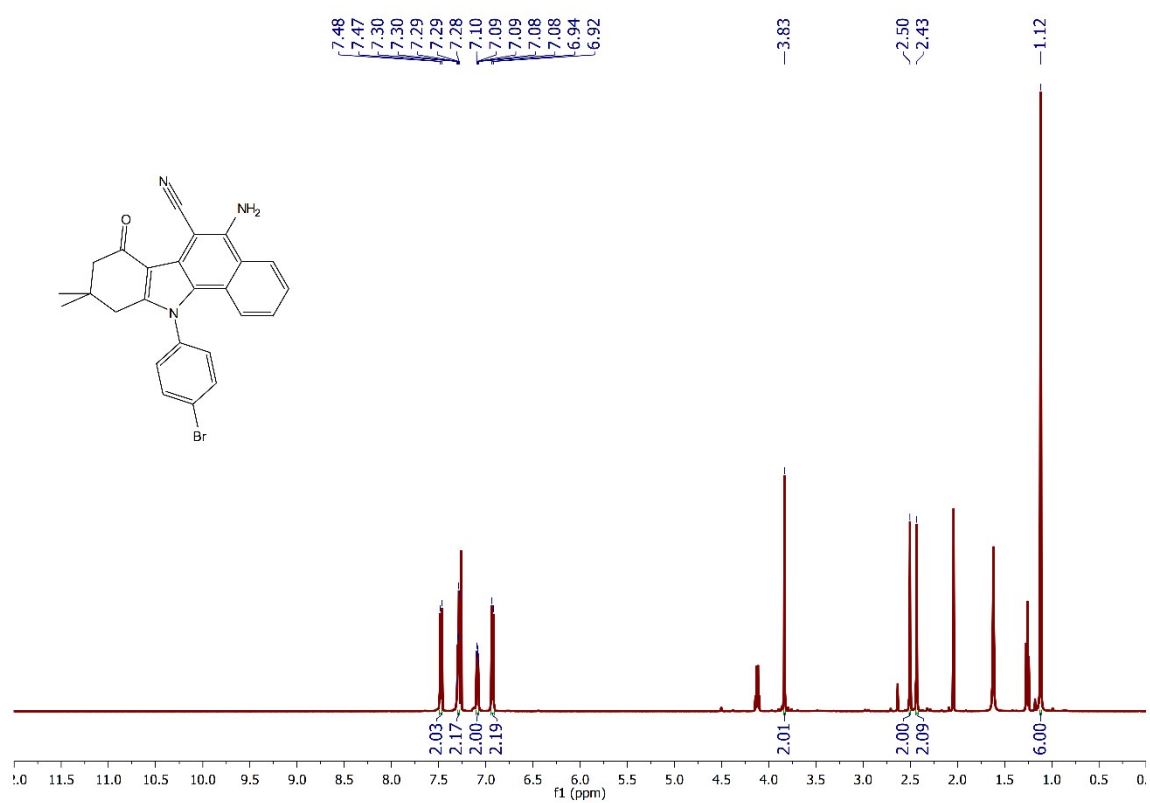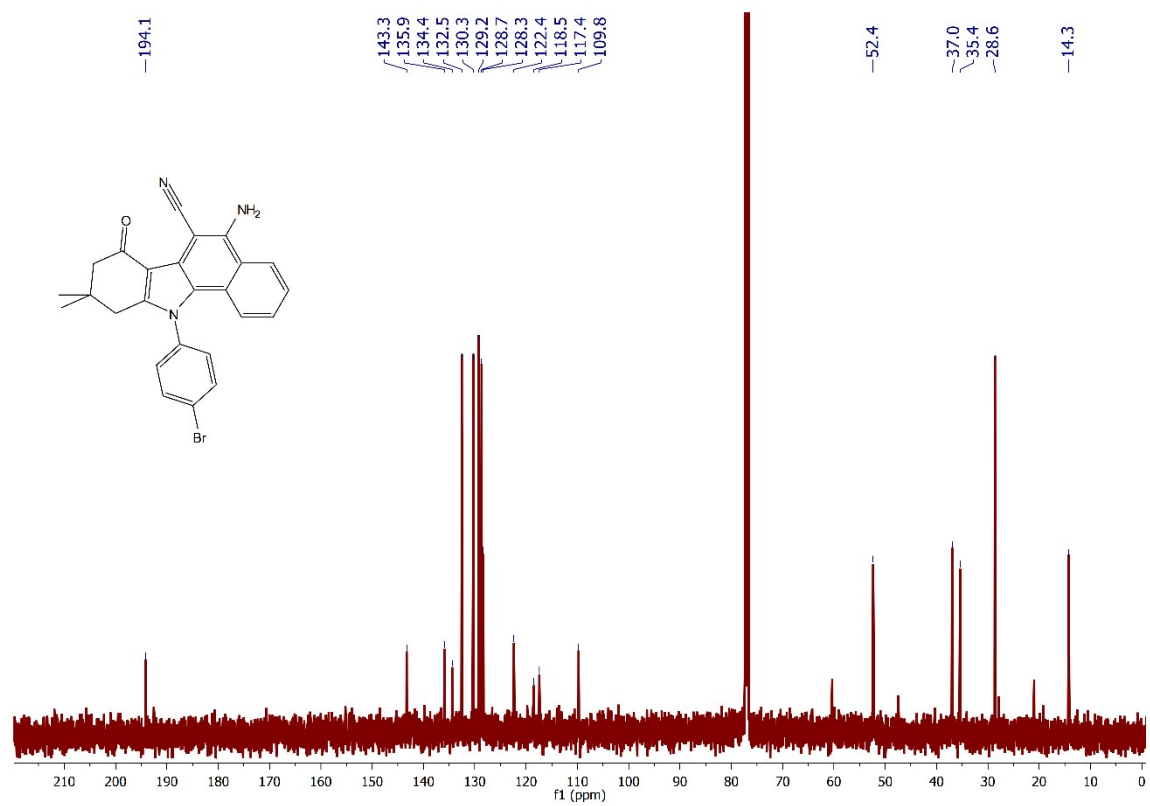

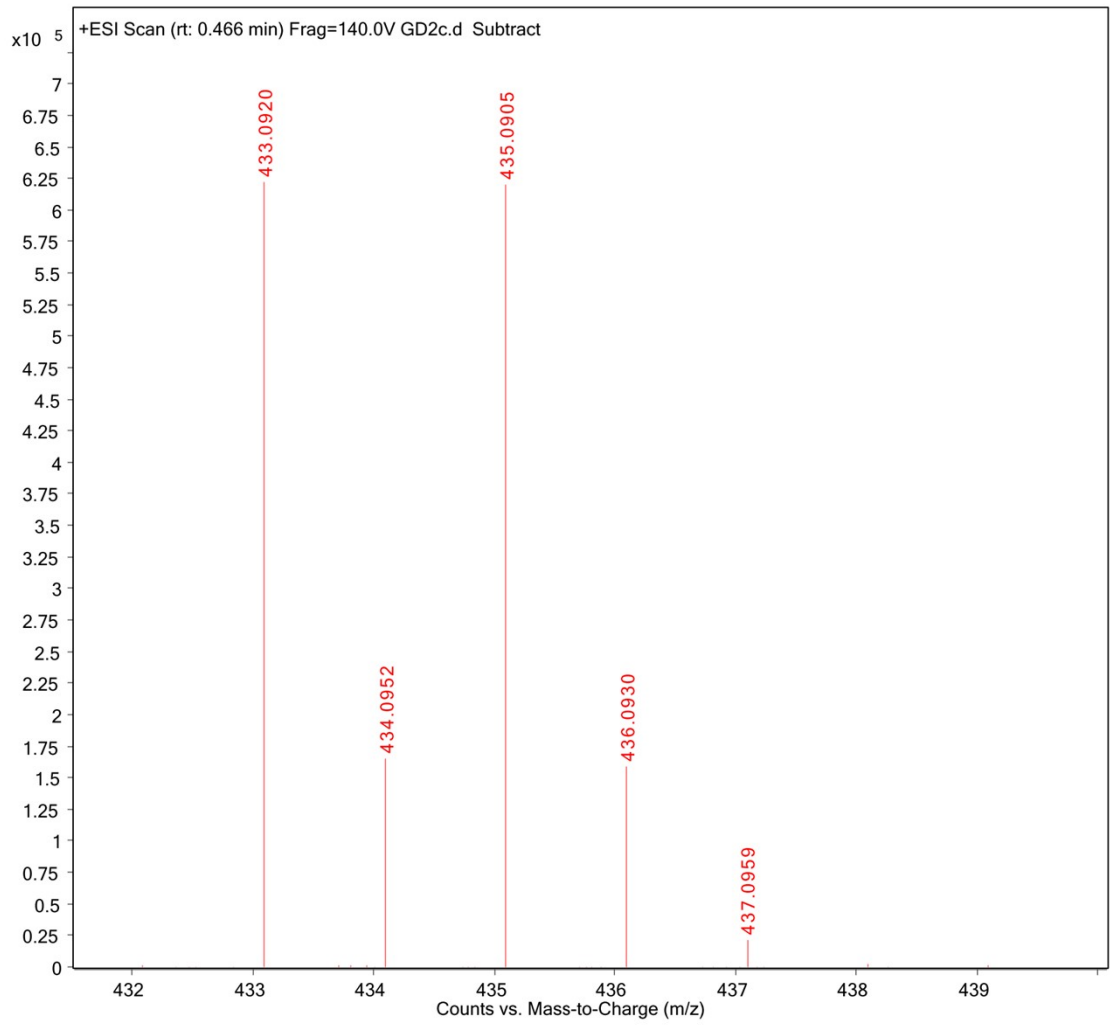

**<sup>1</sup>H, <sup>13</sup>C NMR spectra and HRMS of 5-amino-11-(3,4-dichlorophenyl)-9,9-dimethyl-7-oxo-8,9,10,11-tetrahydro-7H-benzo[*a*]carbazole-6-carbonitrile (5a)**

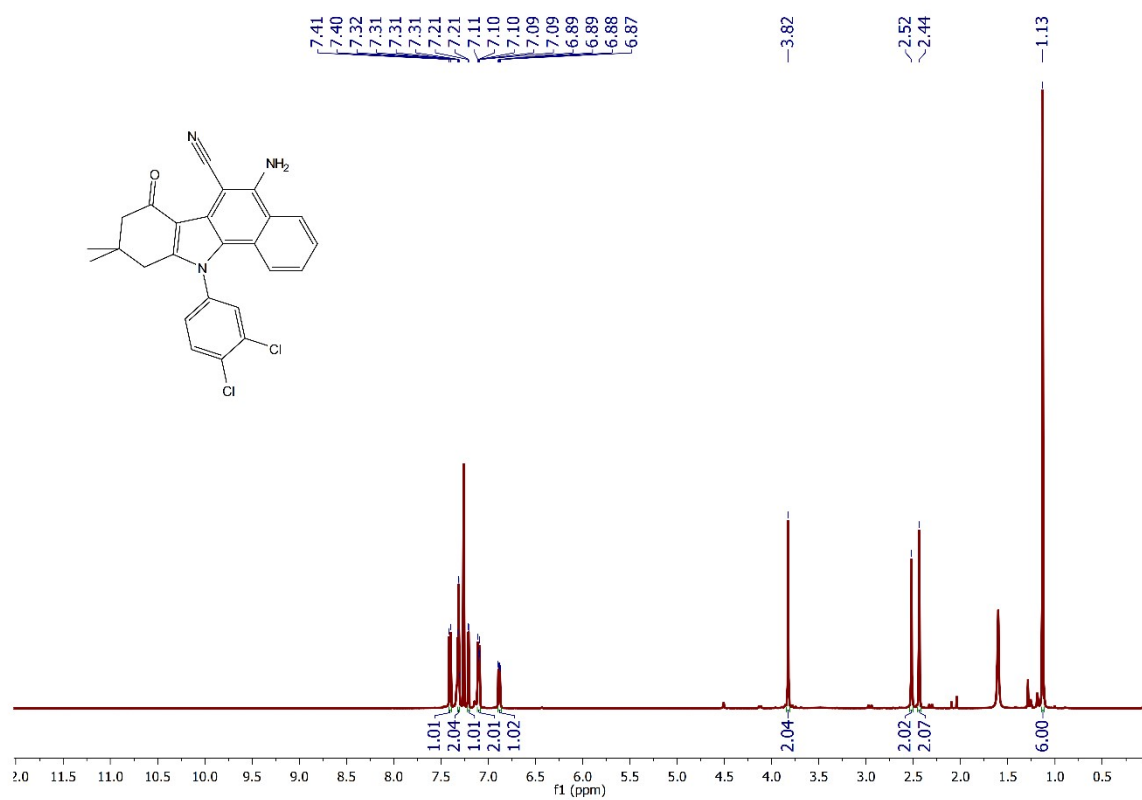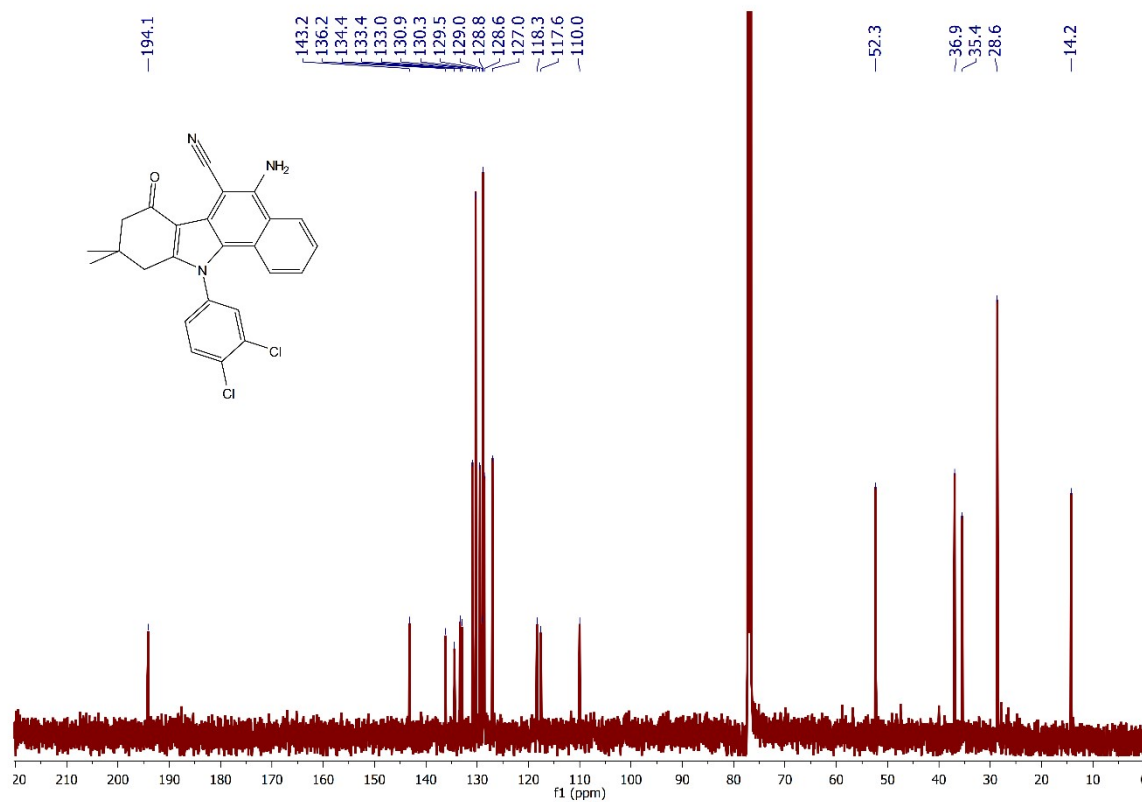

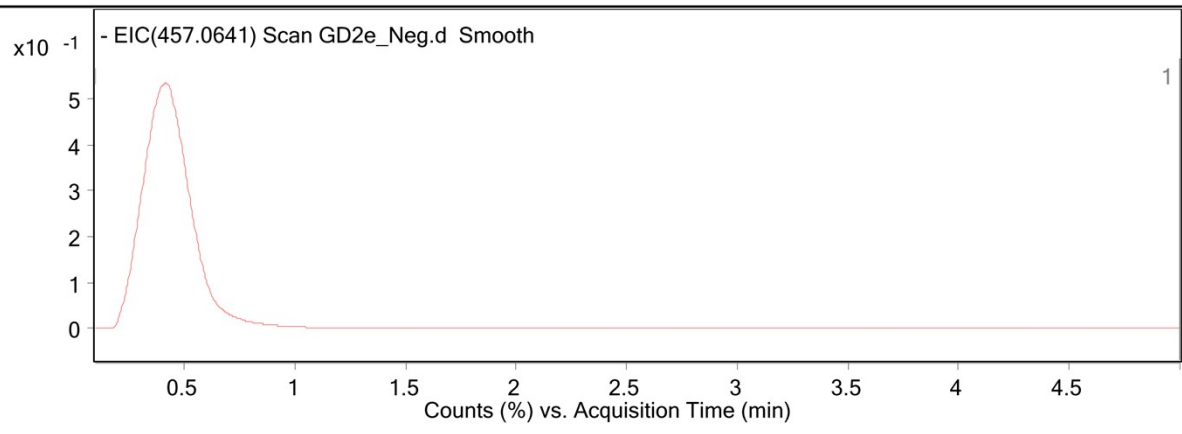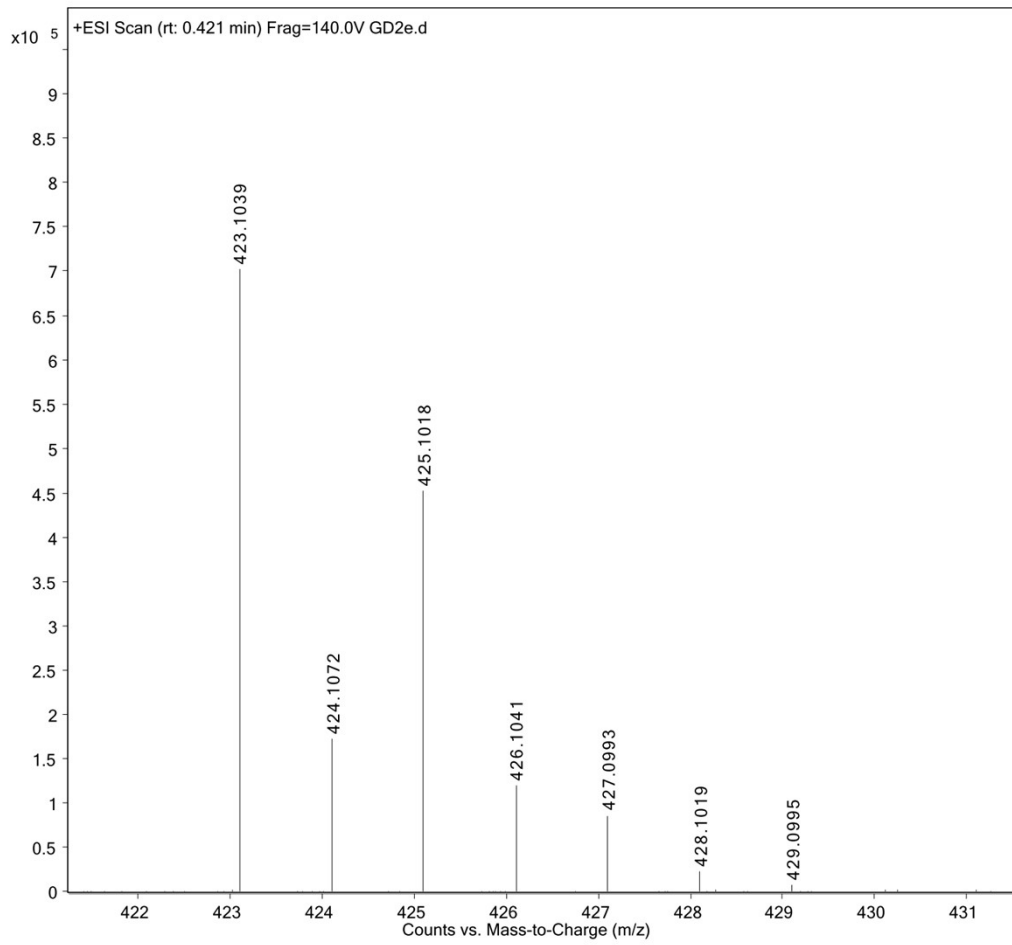

**$^1\text{H}$ ,  $^{13}\text{C}$  NMR spectra and HRMS of 5-amino-11-(1*H*-benzo[d]imidazol-2-yl)-9,9-dimethyl-7-oxo-8,9,10,11-tetrahydro-7*H*-benzo[*a*]carbazole-6-carbonitrile (6a)**

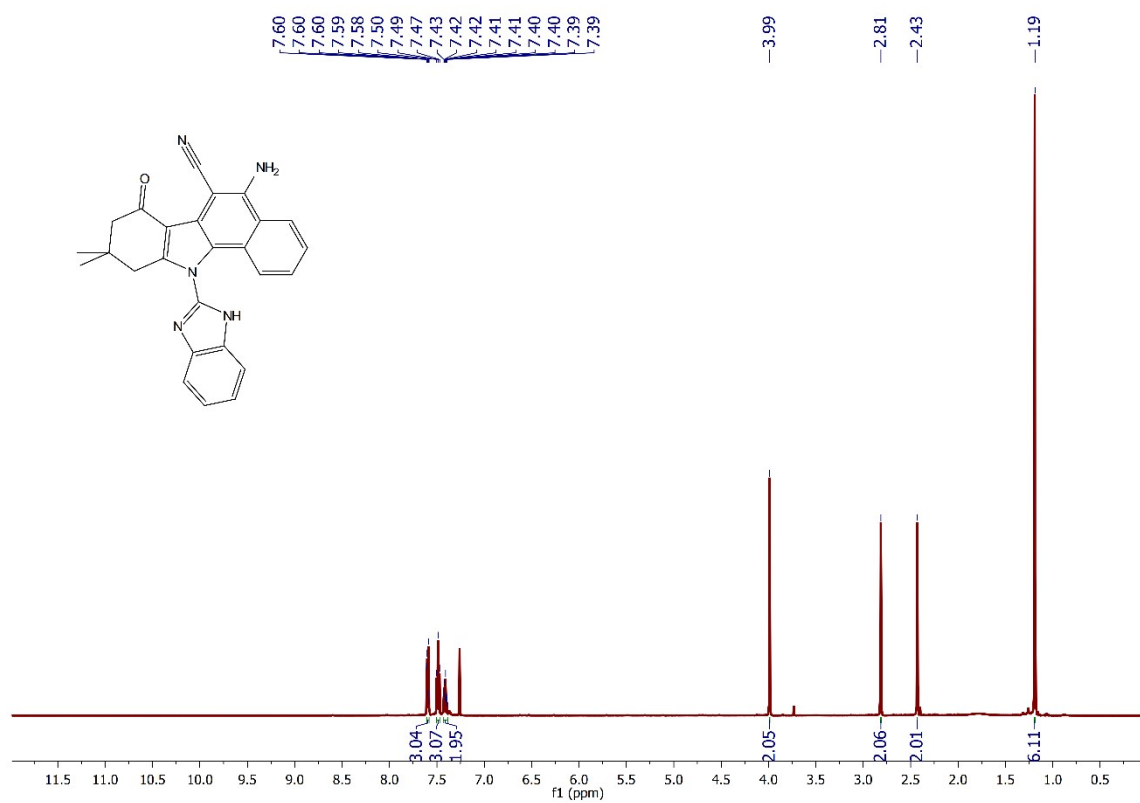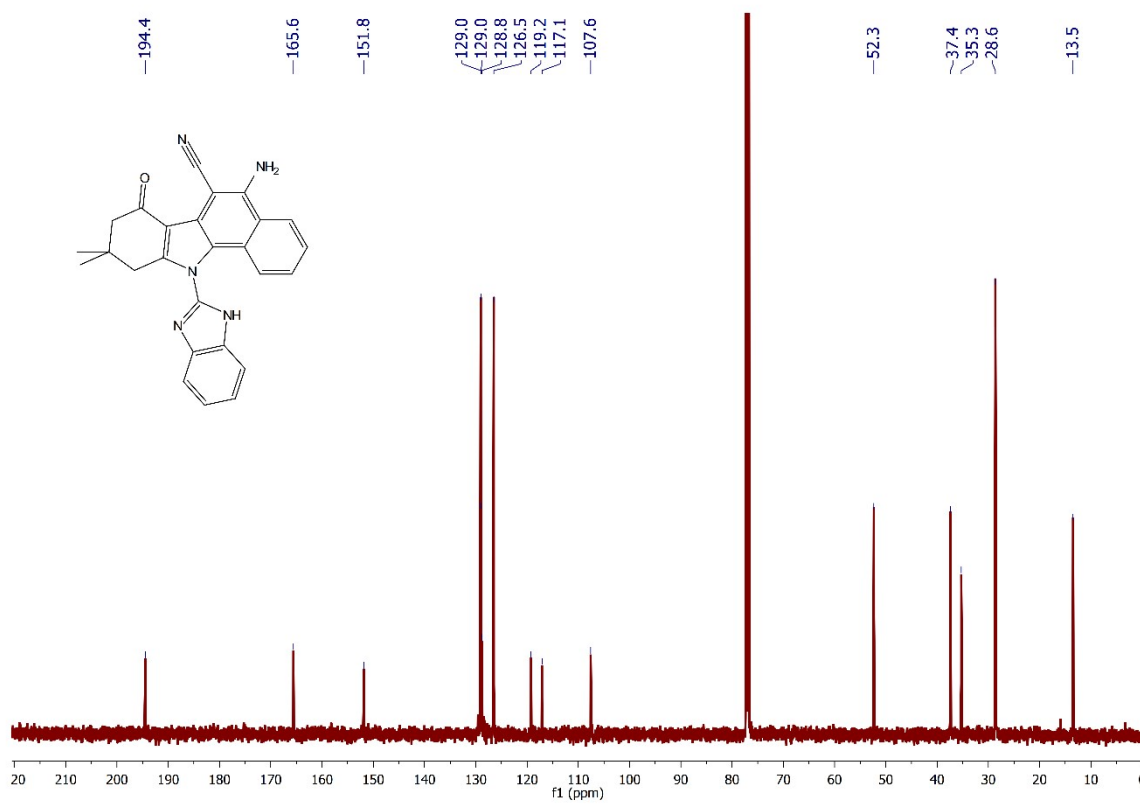

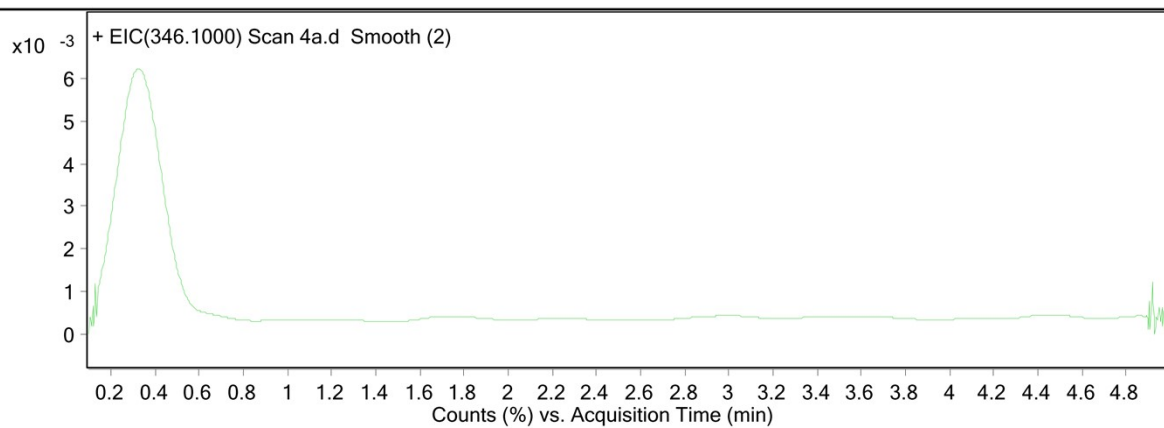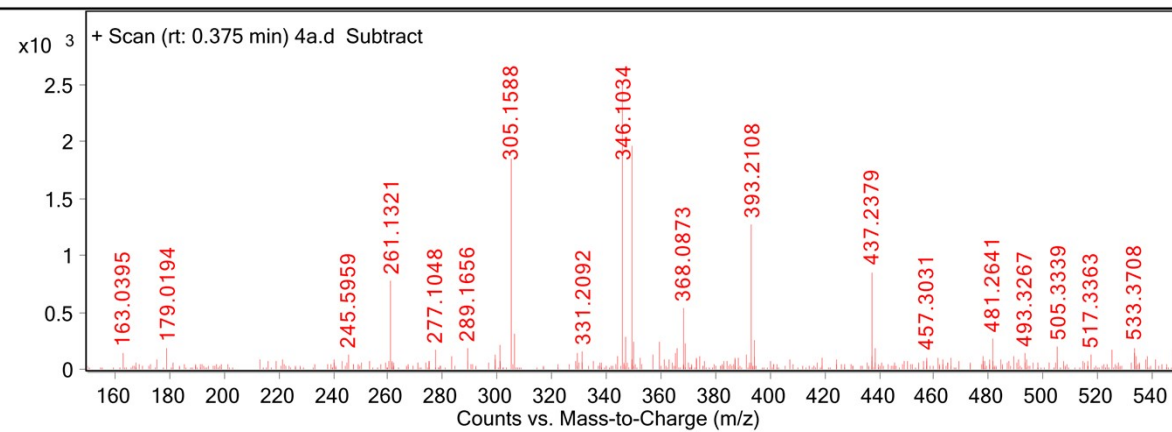



**$^1\text{H}$ ,  $^{13}\text{C}$  NMR spectra and HRMS of 5-amino-9,9-dimethyl-7-oxo-11-(*o*-tolyl)-8,9,10,11-tetrahydro-7*H*-benzo[*a*]carbazole-6-carbonitrile (7a)**

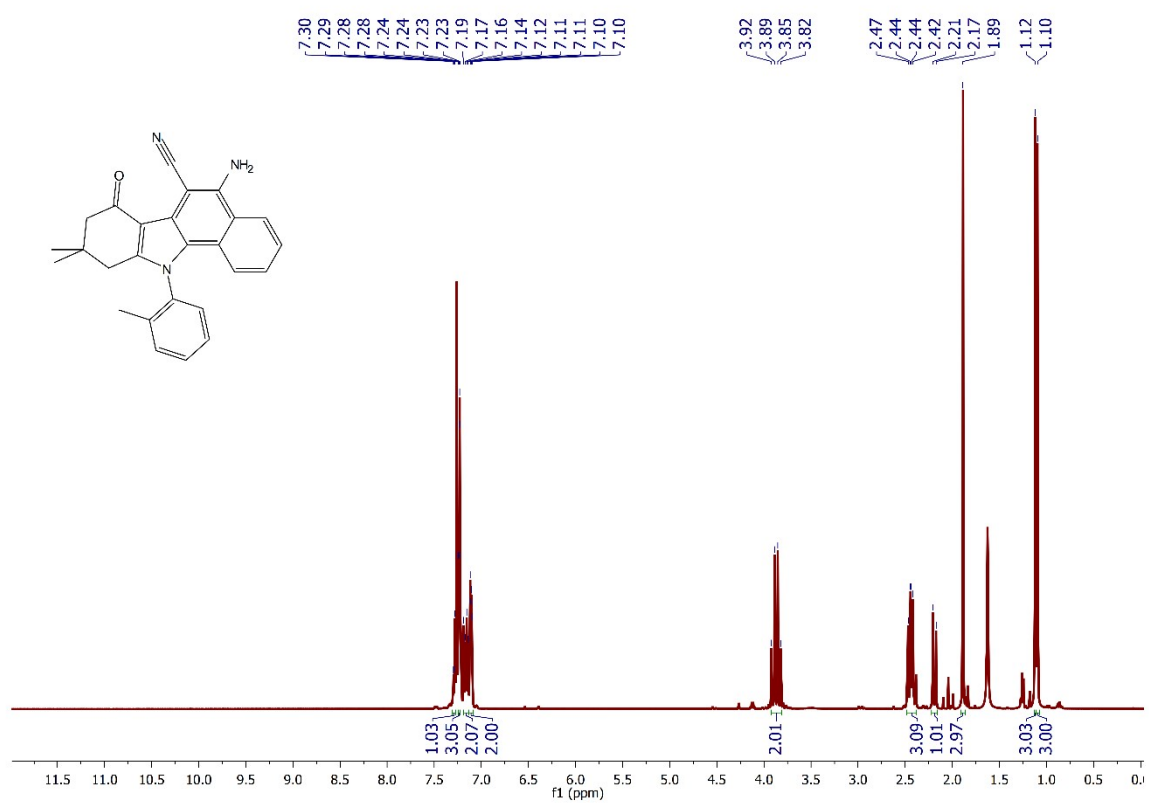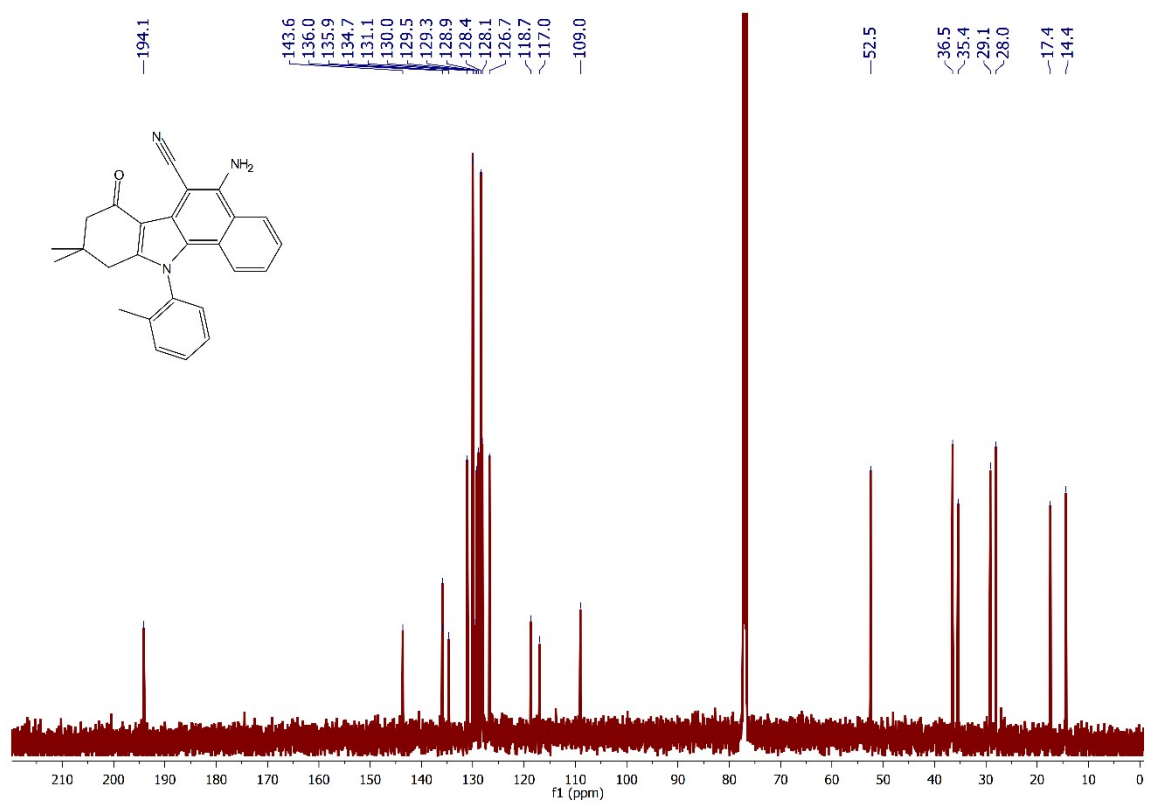

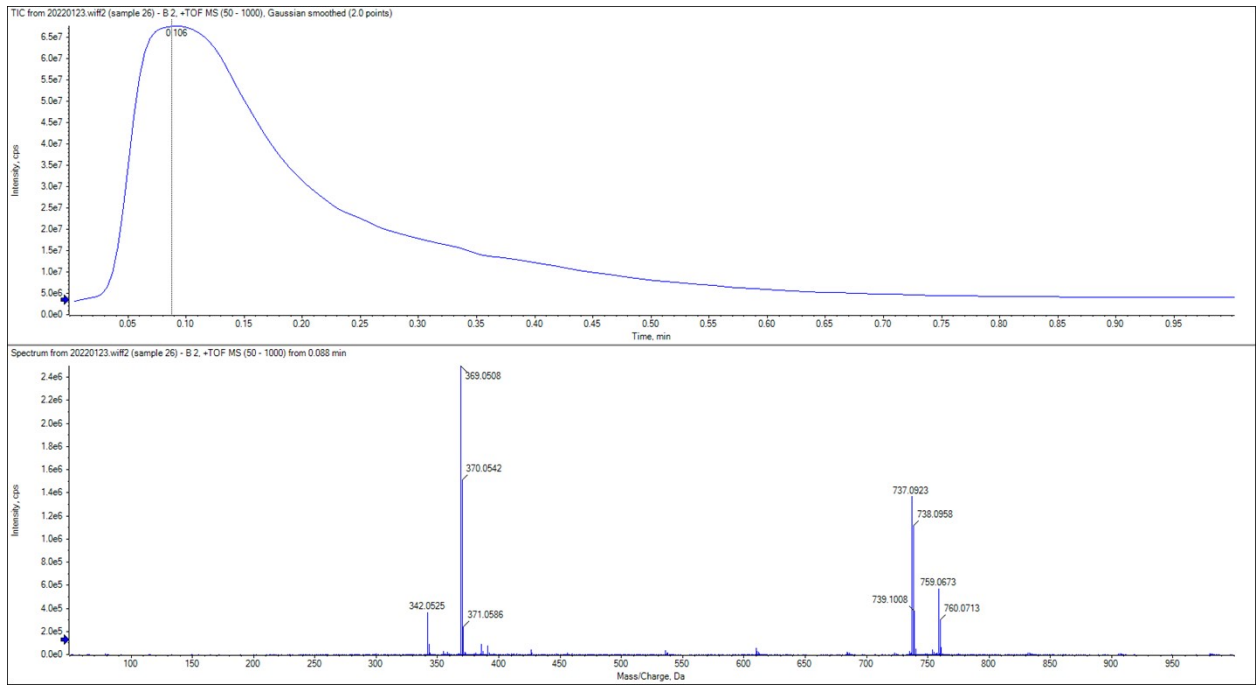

**$^1\text{H}$ ,  $^{13}\text{C}$  NMR spectra and HRMS of 5-amino-7-oxo-11-phenyl-8,9,10,11-tetrahydro-7H-benzo[*a*]carbazole-6-carbonitrile (1b)**

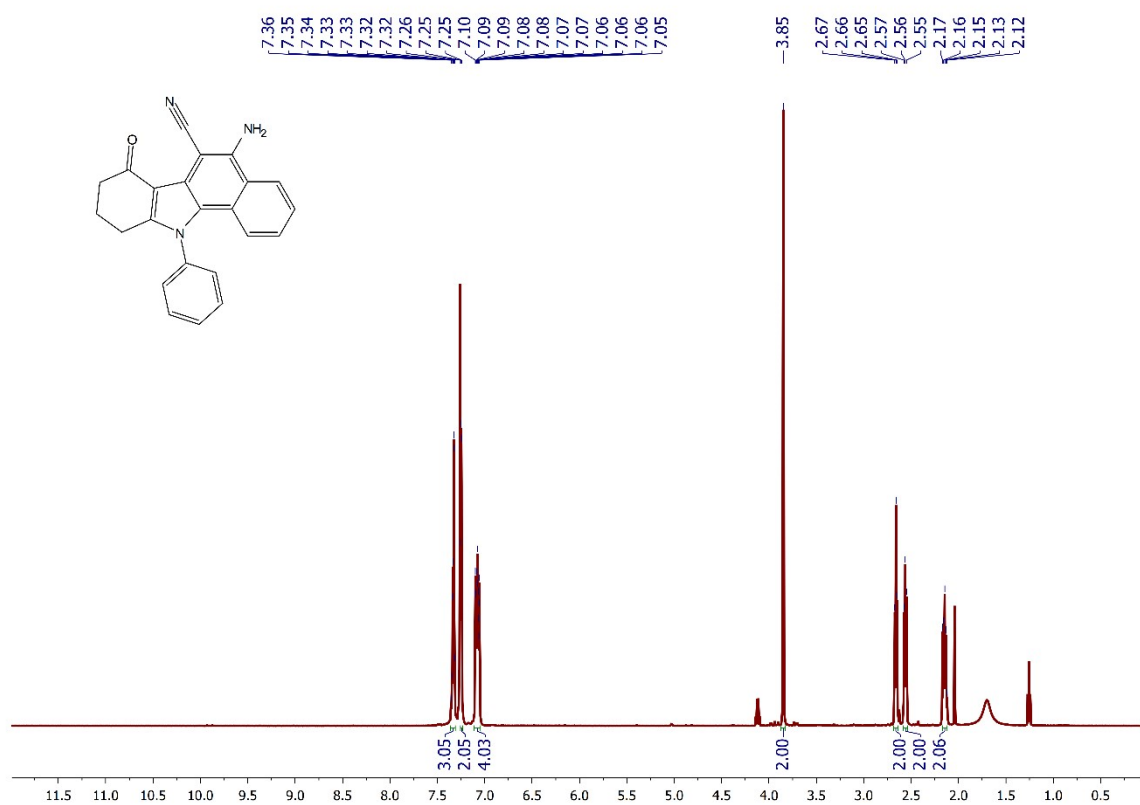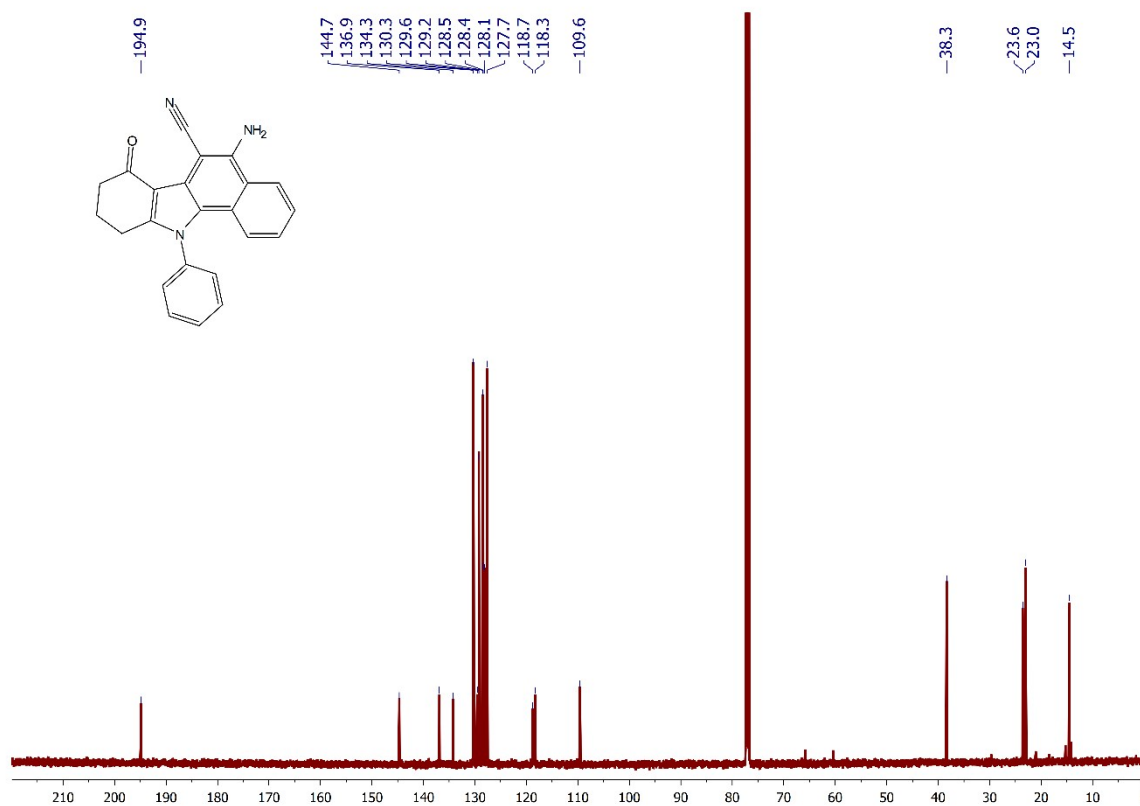

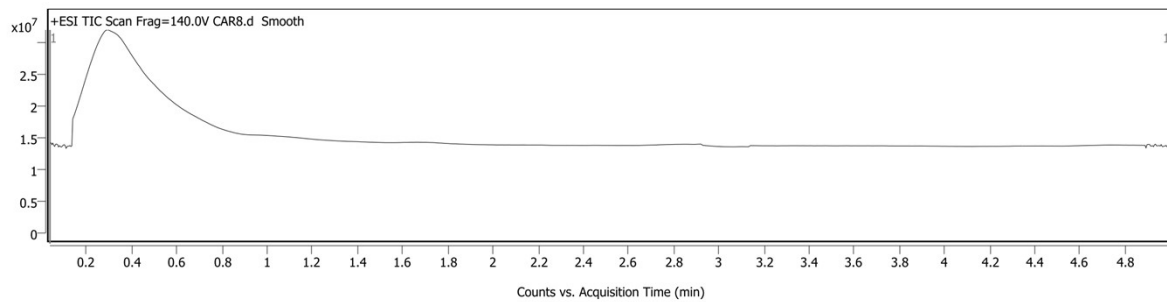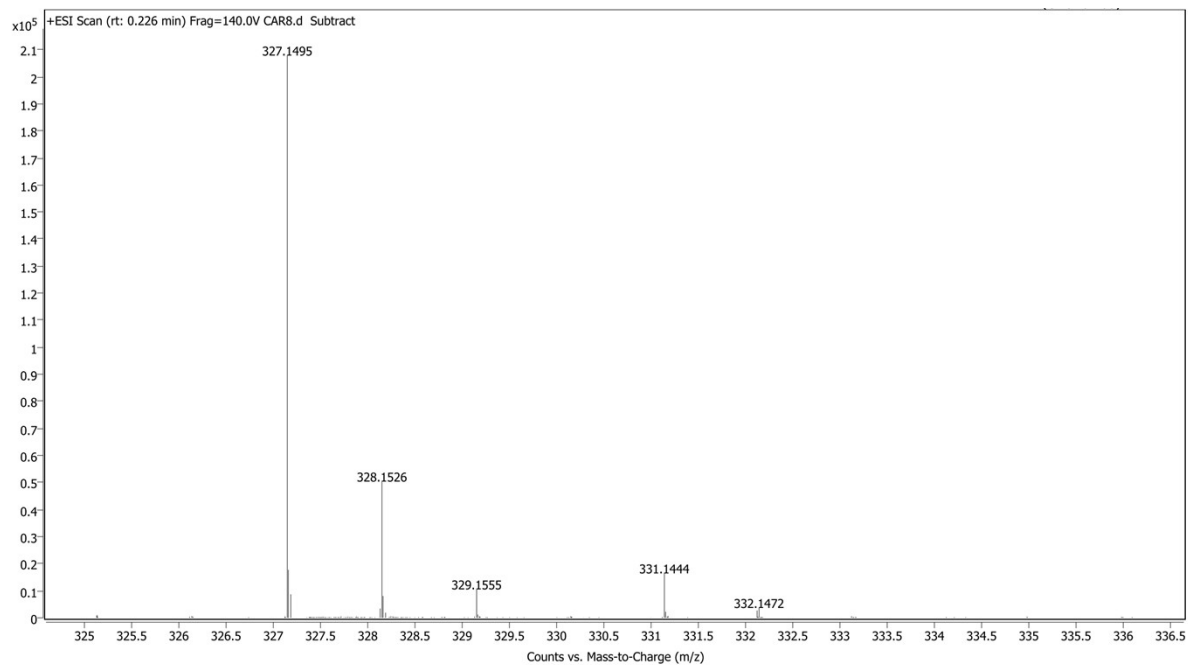

**<sup>1</sup>H, <sup>13</sup>C NMR spectra and HRMS of 5-amino-7-oxo-11-(3,4-dichlorophenyl)-8,9,10,11-tetrahydro-7H-benzo[a]carbazole-6-carbonitrile (5b)**

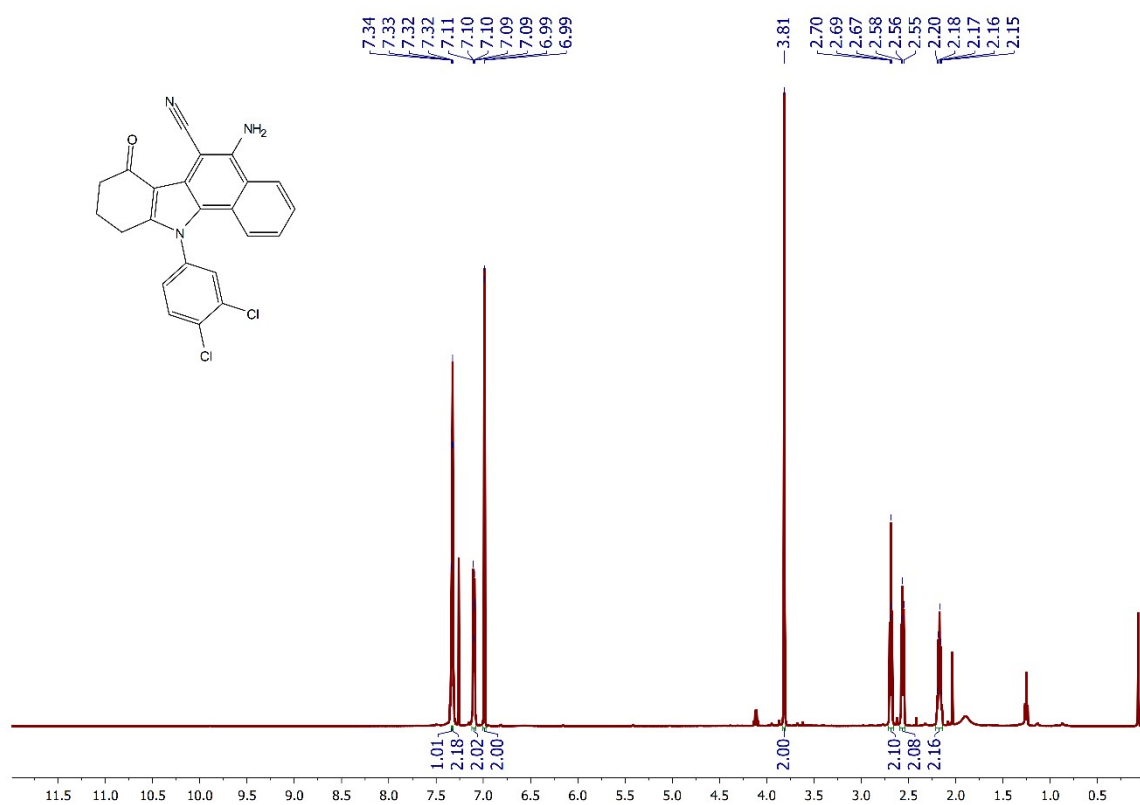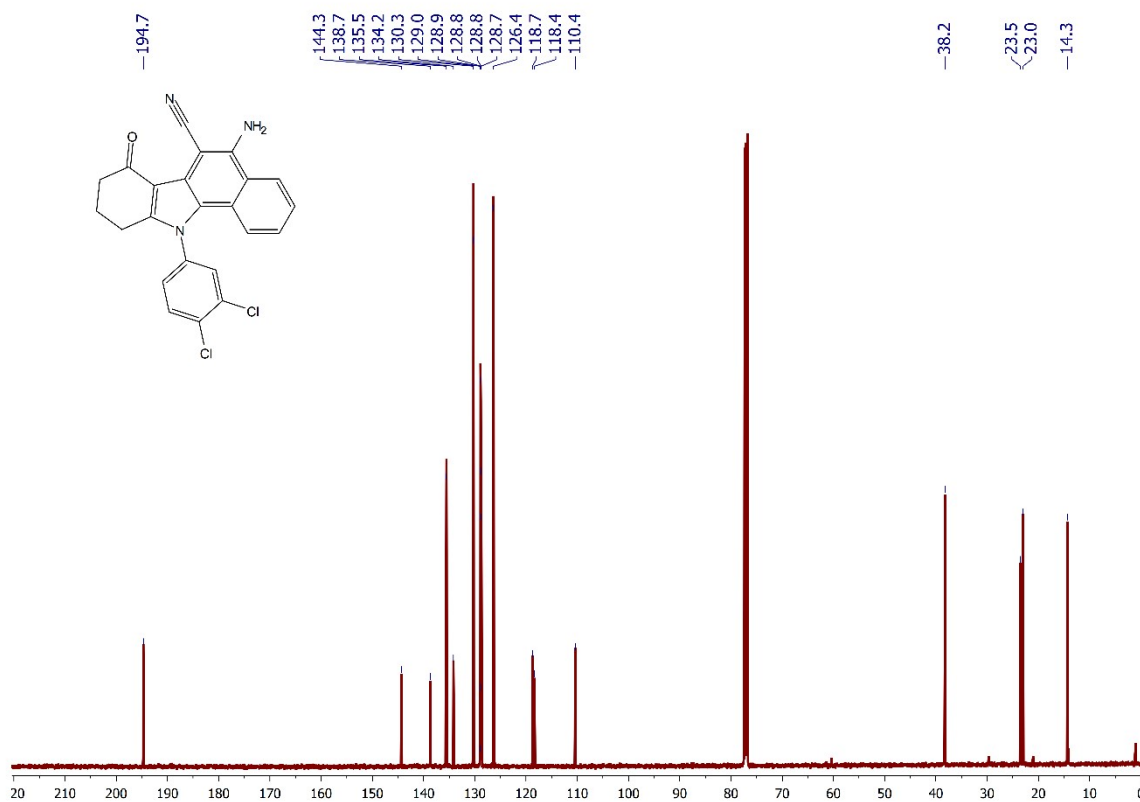

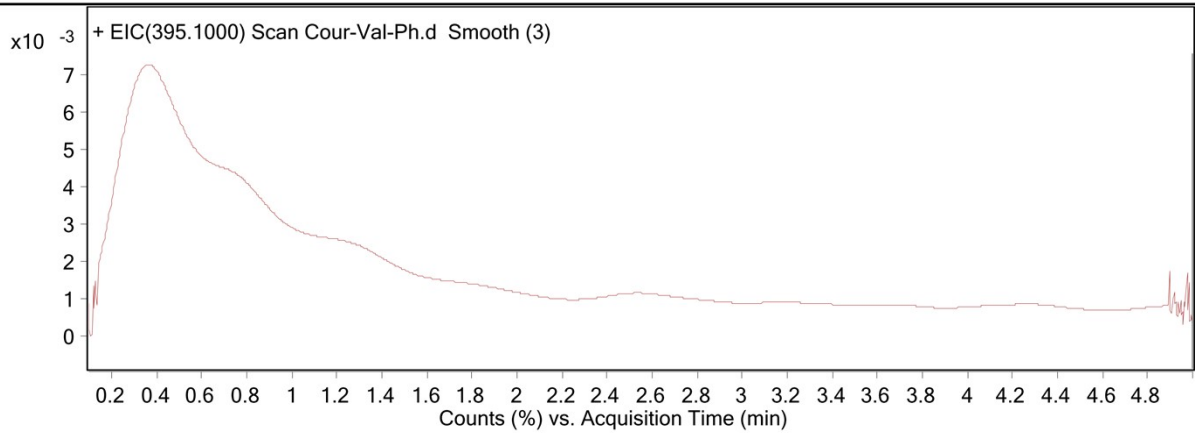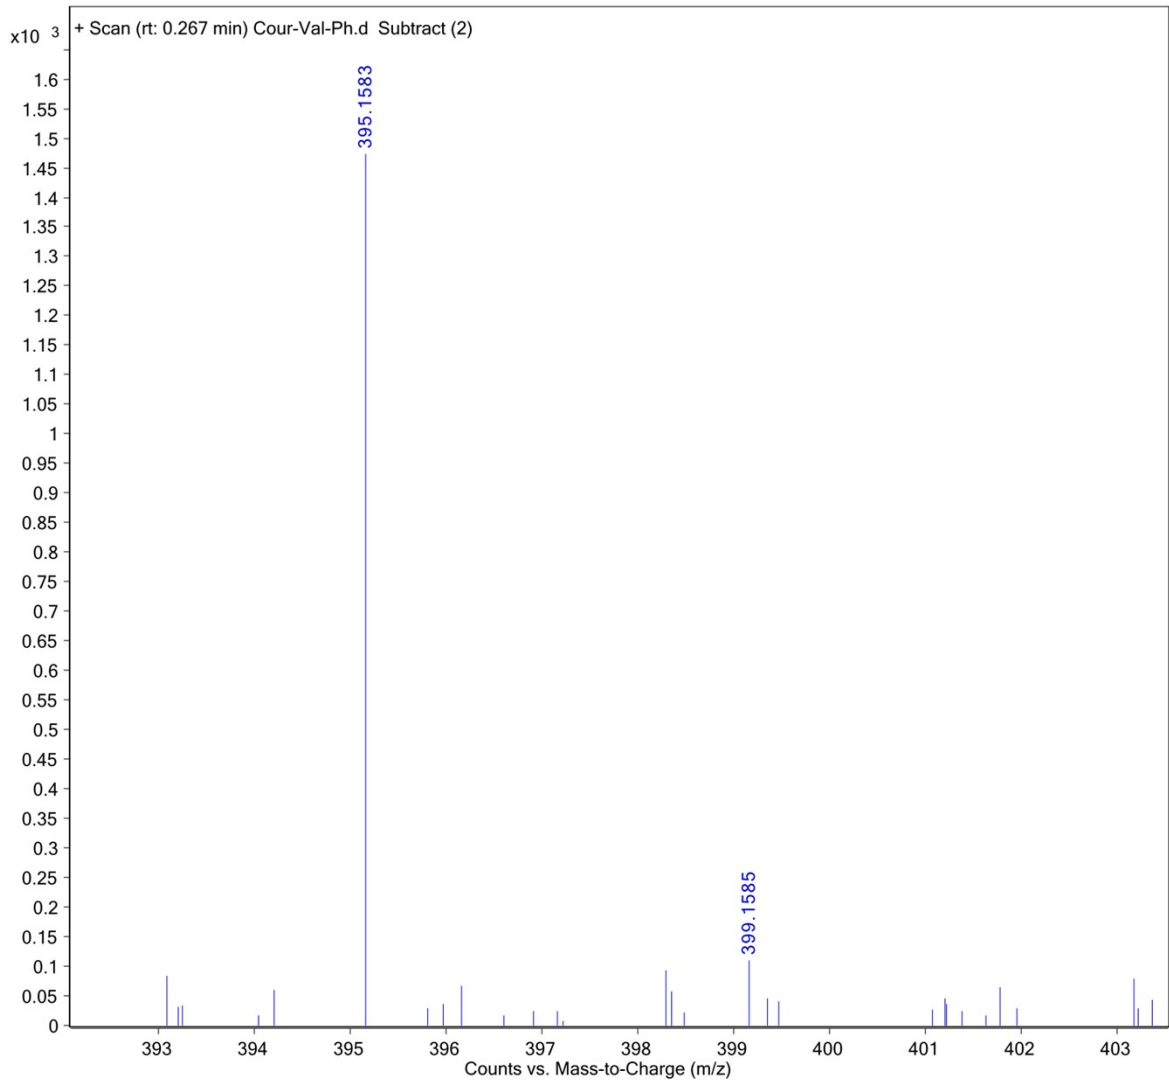

**$^1\text{H}$ ,  $^{13}\text{C}$  NMR spectra and HRMS of 5-amino-7-oxo-11-(*o*-tolyl)-8,9,10,11-tetrahydro-7*H*-benzo[*a*]carbazole-6-carbonitrile (7b)**

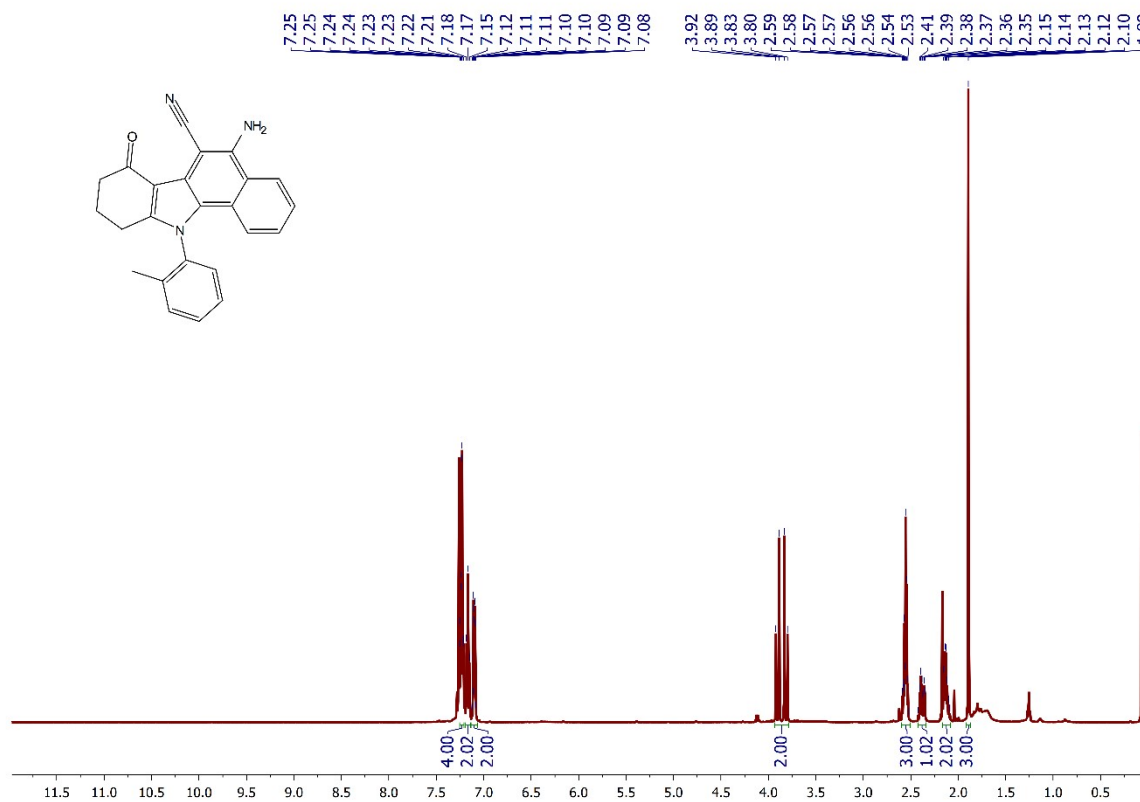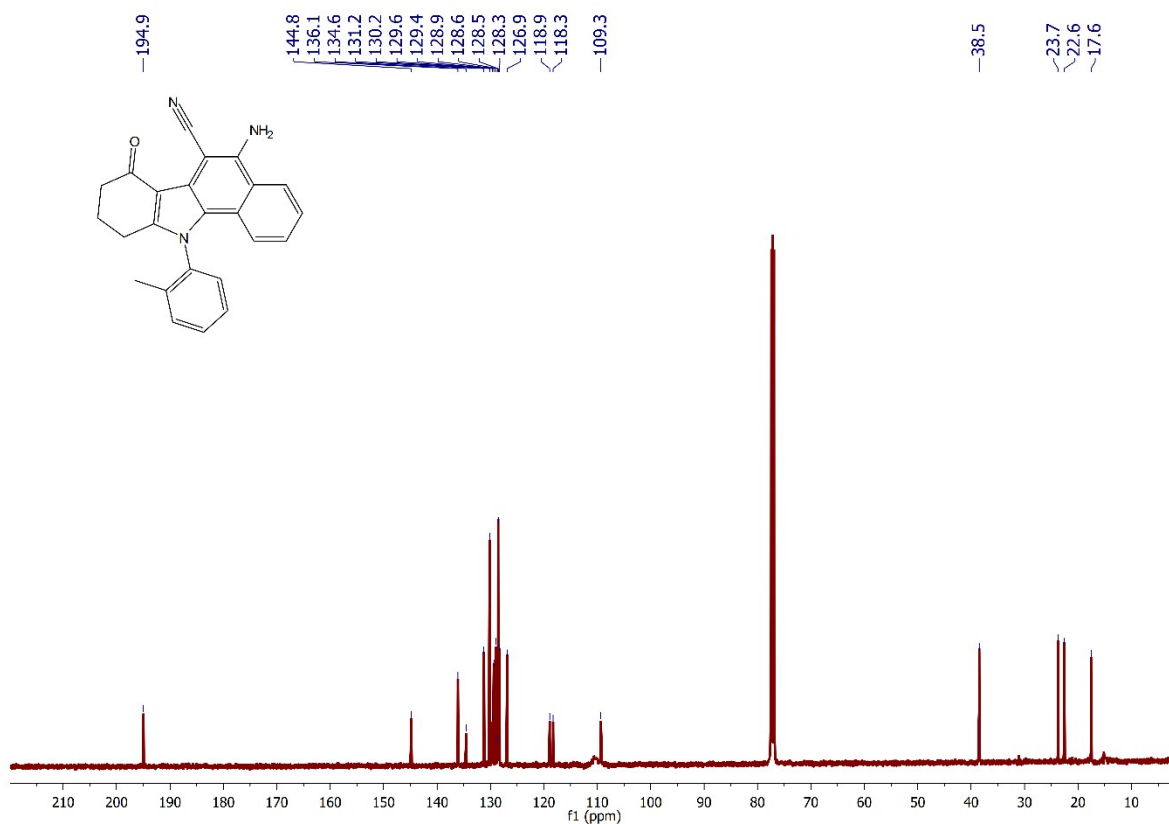

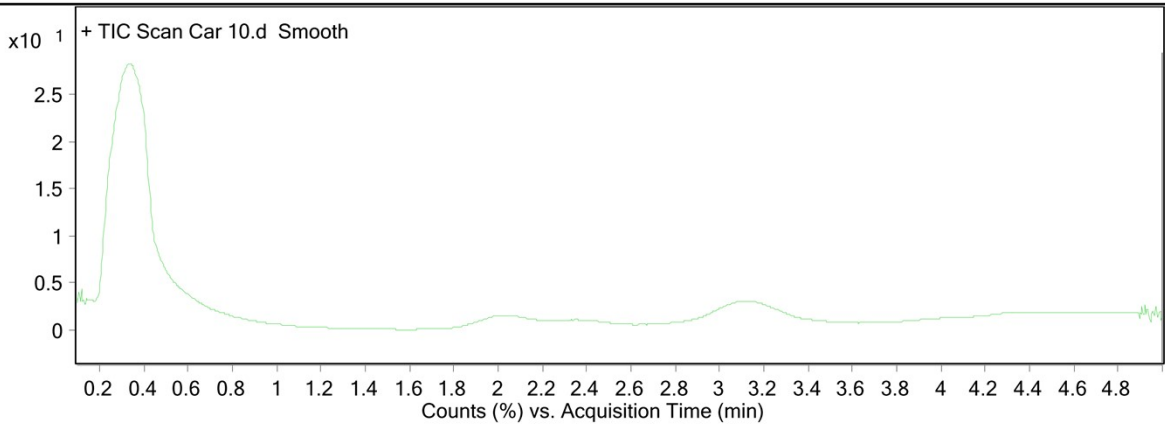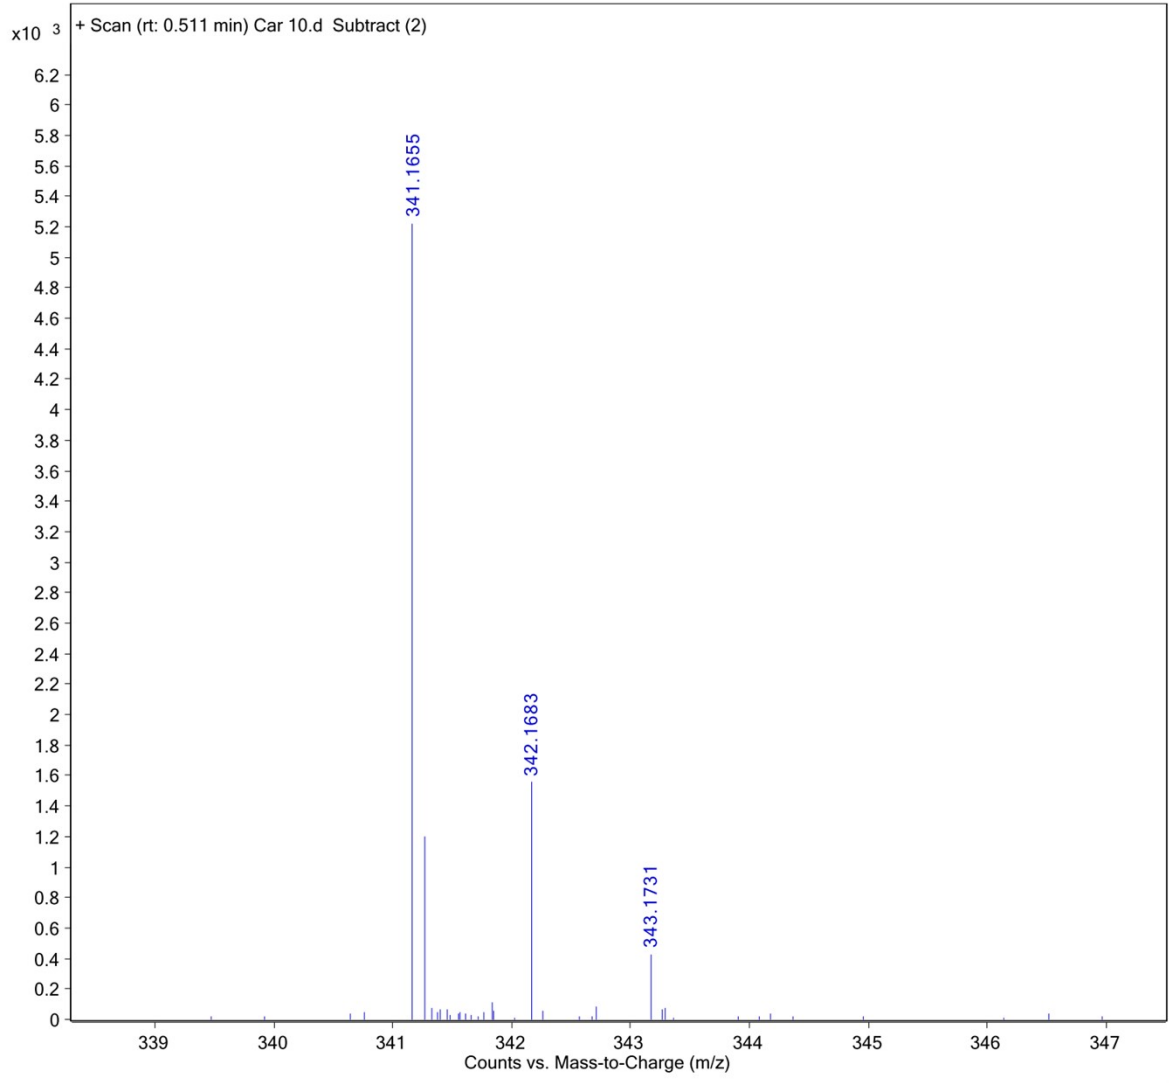

Supplement: d3ra04943d1.pdf [file d3ra04943d1.pdf]
